# Reproductive workers show queen-like gene expression in an intermediately eusocial insect, the buff-tailed bumble bee *Bombus terrestris*.

---

MC HARRISON, RL HAMMOND, EB MALLON

Dept. Biology

University of Leicester

University Road

Leicester, LE1 7RH

Phone: ++ (0)116 252 3339

Fax: +44 (0)116 252 3330

E-mail: [mch44@le.ac.uk](mailto:mch44@le.ac.uk)

**Keywords:** Hymenoptera, eusociality, castes, differential expression, polyphenism

Running title: "Differential expression in *Bombus terrestris*"

## Abstract

Bumble bees represent a taxon with an intermediate level of eusociality within Hymenoptera. The clear division of reproduction between a single founding queen and the largely sterile workers is characteristic for highly eusocial species, whereas the morphological similarity between the bumble bee queen and the workers is typical for more primitively eusocial hymenopterans. Also, unlike other highly eusocial hymenopterans, division of labour among worker sub-castes is plastic and not predetermined by morphology or age. We conducted a differential expression analysis based on RNA-seq data from 11 combinations of developmental stage and caste to investigate how a single genome can produce the distinct castes of queens, workers and males in the buff-tailed bumble bee *Bombus terrestris*. Based on expression patterns, we found males to be the most distinct of all adult castes (2,411 transcripts differentially expressed compared to non-reproductive workers). However, only relatively few transcripts were differentially expressed between males and workers during development (larvae: 71, pupae: 162). This indicates the need for more distinct expression patterns to control behaviour and physiology in adults compared to those required to create different morphologies. Among female castes, reproductive workers and their non-reproductive sisters displayed differential expression in over ten times more transcripts compared to the differential expression found between reproductive workers and their mother queen. This suggests a strong shift towards a more queen-like behaviour and physiology when a worker becomes fertile. This contrasts with eusocial species where reproductive workers are more similar to non-reproductive workers than the queen.

## 1 Introduction

2 Eusociality, the division of adult females in reproductive queens and mainly sterile workers that care  
3 for the brood, has evolved multiple times independently within the Hymenoptera (bees, ants and wasps;  
4 Andersson 1984). The level of sociality varies within the Hymenoptera, ranging from non-social solitary  
5 species through primitively eusocial to highly eusocial taxa. Among highly eusocial hymenopterans,  
6 beside the clear division of reproduction between morphologically distinct workers and queens, further  
7 worker sub-castes exist. These worker sub-castes specialise in a particular set of tasks for a certain  
8 amount of time. Members of the sub-castes may be responsible for, among others things, brood care,  
9 foraging or nest-guarding. In some ant groups worker sub-castes are morphologically distinct and display,  
10 at the least, a clear size polymorphism (Buckingham, 1911; Detrain and Pasteels, 1992). In other highly  
11 eusocial taxa worker sub-castes are monomorphic and task specialisation is determined by age (Cameron,  
12 1989). In primitively eusocial taxa, such as the paper wasp *Polistes*, female adult castes are behaviourally  
13 distinct but monomorphic and behaviourally plastic, meaning an adult worker can potentially become  
14 the dominant, reproducing queen at any time by replacing the current queen or founding a new colony  
15 (Sumner et al., 2006; Reeve et al., 2000).

16 These distinct morphological and behavioural castes, which exist among adult females of a eusocial  
17 colony, are based on alternative expression of the same genome. The plasticity of the behavioural castes in  
18 the primitively eusocial paper wasp, *Polistes canadensis*, was demonstrated by the existence of overlapping  
19 gene expression patterns along a continuum from newly emerged females, through intermediate workers  
20 to the dominant queens (Sumner et al., 2006). Most gene expression studies in this area have, however,  
21 concentrated on highly eusocial taxa. Large differences in gene expression have been recorded both  
22 between the morphologically distinct queens and workers (*Temnothorax longispinosus*: Feldmeyer et al.  
23 2014; *Vespula squamosa*: Hoffman and Goodisman 2007; *Solenopsis invicta* & *S. richteri*: Ometto et al.  
24 2011; *Apis mellifera*: Grozinger et al. 2007) and between monomorphic, behavioural worker sub-castes  
25 (*Temnothorax longispinosus*: Feldmeyer et al. 2014). The expression patterns of reproductive workers,  
26 that lay unfertilised eggs later in a colony cycle, become more 'queen-like' but they still remain more  
27 similar to non-reproductive workers than queens (Grozinger et al., 2007; Feldmeyer et al., 2014). Of the  
28 many genes found to be involved in caste differentiation *vitellogenin* has perhaps received most attention  
29 and has been shown to be differentially expressed among female castes of the honey bee and several ant  
30 species (Amdam et al., 2003; Feldmeyer et al., 2014; Corona et al., 2013; Morandin et al., 2014). Often in  
31 such studies a heavy focus has been placed on adult female castes, however, little work has been done to  
32 elucidate expression differences of males, but see Nipitwattanaphon *et al.* (2014). The haploid males are  
33 both morphologically and behaviourally distinct from their sisters and mother, but, although they differ

34 in their ploidy level, they otherwise share the same genes as other colony members and are therefore also  
35 alternative expressions of the same genome.

36 Bumble bees represent an interesting taxon to study the phenomenon of eusociality as they possess  
37 both highly eusocial characteristics and more primitive features. For instance, whether a female will  
38 become a queen or a worker is irreversibly determined during development, as is the case for highly  
39 eusocial taxa. However, although a clear size dimorphism exists between queens and workers, generally  
40 both female adult castes are morphologically similar as in primitively eusocial species. Workers take  
41 on distinct tasks within a colony but the division of labour is more plastic than is the case for higher  
42 eusocial bees and is generally not temporally fixed (Cameron, 1989). Furthermore, towards the end of  
43 the colony cycle the division of labour between workers and reproductive queens breaks down and queens  
44 and workers come into direct conflict over the parentage of males. At this stage some workers activate  
45 their ovaries and begin to lay eggs and in the process become highly aggressive towards each other and  
46 also the queen (Alaux et al., 2004; Bloch, 1999).

47 So far no broad-scale studies have been conducted, which focus on the expression patterns involved  
48 in caste determination within bumble bees, although two previous studies did present some caste specific  
49 genes (Pereboom et al., 2005; Colgan et al., 2011). Pereboom et al. (2005) investigated how and when  
50 females developed into queens or workers. They identified, using suppression subtractive hybridisation, 12  
51 genes whose expression differed in the comparisons: (1) worker and queen 1st instar larvae; (2) worker and  
52 queen 4th instar larvae; (3) adult queens and workers; (4) reproductive and non-reproductive workers.  
53 Colgan et al. (2011), within their analysis of the bumble bee transcriptome, found a high number of  
54 transcripts (2,185) that differ in their expression between adult castes, genders and developmental stages  
55 but considered their results as preliminary due to a lack of replication (1 larva, 1 pupa, 2 adult workers,  
56 1 adult male and 1 virgin queen).

57 Here, using RNA-seq, we investigate genes involved in caste determination within the buff-tailed  
58 bumble bee, *Bombus terrestris*. We compare expression patterns of reproductive workers with those of  
59 non-reproductive workers and queens to isolate genes which are important for the acquisition of fertility  
60 as well as genes which may control behaviour differences compared to non-reproductive workers. Because  
61 of the flexible, plastic nature of bumble bee worker sub-castes (Cameron, 1989), reproductive workers are  
62 capable of becoming more 'queen-like' not only in their fertility but also in their behaviour. We therefore  
63 test the hypothesis that there is a greater similarity in gene expression patterns between queens and  
64 reproductive workers compared to those found in less plastic highly eusocial species.

65 Furthermore, we explore genes that control the specific behaviour and morphology of males. We inves-  
66 tigate the question when, during the ontogeny of a male bumble bee, is the difference in gene expression  
67 to workers the greatest? Is the male gene expression pattern more distinct during larval development

68 when the gonads and imaginal discs are generated? Are more genes involved in the development of the  
69 adult morphology during the pupal phase? Or does indeed the development and control of distinct be-  
70 haviours among adults require the most distinct gene expression pattern? To address these questions we  
71 compare gene expression patterns of males and workers both within larvae and pupae. In adults, we anal-  
72 yse differences in expression patterns between males, queens, reproductive workers and non-reproductive  
73 workers.

## 74 **Materials & Methods**

### 75 *Colonies*

76 Six young, commercially available *B. terrestris audax* colonies were obtained from Agralan Ltd. Initially  
77 the colonies consisted of a mother queen and 8 to 20 workers. All colonies were kept in wooden nest boxes  
78 with the inner dimensions of 24 x 16 x 13.5 cm. The bees were supplied with pollen (mixed polifloral  
79 pollen, [www.naturallygreen.co.uk](http://www.naturallygreen.co.uk)) and a sugar solution (BIOGLUC<sup>®</sup>, Biobest) *ab libitum*. All colonies  
80 were kept in identical conditions within the same room at 26°C and 60% humidity in constant darkness.

### 81 *Sampling*

82 We aimed to collect samples from 11 different combinations of caste and developmental stage, each from  
83 3 independent colonies. Within larvae and pupae these were workers, males and queens, while in adults  
84 we intended to collect males, reproductive workers, non-reproductive workers, mother queens and virgin  
85 queens.

86 Sampling was carried out under red light conditions. The gender of adults was determined by counting  
87 antennal segments (males: 13; females: 12) and checking for the presence or absence of a sting (Prys-Jones  
88 and Corbet, 1987), while queens were identified via their superior mass (adult workers ranged from 26 to  
89 325 mg, male adults from 127 to 347 mg and adult queens from 616 to 1,191 mg). In order to identify  
90 reproductive adult workers, samples from each colony were anaesthetised by cooling for approximately  
91 10 minutes, and their abdomens were dissected to observe ovary development. In order to avoid loss of  
92 RNA, dissections lasted only a few seconds and samples were immediately snap frozen in liquid nitrogen.  
93 Workers with developed ovaries were labeled 'reproductive'. The workers, in which ovaries were not  
94 visible, were categorised to be of 'undetermined reproductive status', because of the potential time-lag  
95 between the expression of reproductive genes and subsequent changes in ovary morphology.

96 For the sampling of workers, queens and males during larval and pupal stages the following protocol  
97 was followed. The colonies were photographed at regular intervals of one to two days to monitor the  
98 emergence of new batches and their development. With the term 'batch' we refer to a single cohort of

99 offspring laid together. At intervals of at least three days larvae and pupae were sampled from each batch  
100 while ensuring at least half of each batch was allowed to develop to adulthood. We collected larvae from  
101 each of the four larva instar stages based on their weight according to Cnaani et al. (1997) and assuming  
102 male instar masses were similar to worker instars. Pupae were collected both shortly after pupation  
103 (pre-pupae) and later in pupal development when appendages were developed.

104 Importantly gender and caste of all sampled larvae and pupae were confirmed by isolating batches  
105 after pupation and sexing all emerging adults. Only if 100% of the unsampled adults emerging from  
106 a batch belonged to the same gender and caste would the samples from that batch be considered for  
107 analysis. All samples were collected between the hours of 9am and 5pm as soon as they became available.  
108 They were immediately weighed, snap-frozen in liquid nitrogen and then stored at  $-80^{\circ}\text{C}$ .

109 Worker larvae and pupae were obtained from batches laid and reared in young colonies in the presence  
110 of the queen. After sufficient worker batches were available the mother queen was removed from each  
111 colony for sampling. All batches laid in the presence of the queen but hatched shortly before or after  
112 the removal of the queen were considered potential queen batches (Pereboom et al., 2005). Any batches  
113 which were laid after queen removal were considered male batches. Additional male larvae and pupae  
114 were reared by isolating two to three groups of five workers from each colony in separate, small Perspex  
115 boxes containing pollen, sugar water and cat litter. The majority of male larvae and pupae (mean  $67.2\%$   
116  $\pm 8.4\%$  SEM) and all male adults were sampled from the main colonies.

117 As samples of the first larval stage were not obtained for workers from three separate colonies, L1  
118 samples were excluded from all libraries. Adult virgin queens were only obtained from one colony, and  
119 the batches from which they emerged also produced adult workers. Therefore, larvae and pupae were  
120 only confirmed as queens if (1) they were sampled from batches from which adult queens emerged, and  
121 (2) if they exceeded 500mg (no sampled male or worker larva, pupa or adult exceeded 420 mg).

## 122 *RNA extractions*

123 Whole bodies were used for sampling for two reasons. First, we had no prior assumptions regarding the  
124 tissues, within which genes would be differentially expressed between castes, genders and developmental  
125 stages. Second, in order to detect as many differentially expressed genes as possible across all comparisons.  
126 All samples were homogenised directly from  $-80^{\circ}\text{C}$ . This was done within the Eppendorf tube with a plastic  
127 pestle for most larvae and in a ceramic mortar and pestle for large larvae, all pupae, and all adults. The  
128 mortar was filled with liquid nitrogen to keep the samples frozen during homogenisation. This was not  
129 necessary for the homogenisations which took place in Eppendorf tubes as the process was completed  
130 quickly. Total RNA was extracted from all samples using a GenElute Mammalian Total RNA Miniprep  
131 kit (Sigma-Aldrich) following the manufacturers' protocol. The quality and concentration of RNA were

132 estimated with an Agilent 2100 Bioanalyzer.

### 133 *RNA library construction*

134 A total of 27 RNA libraries were constructed that covered all 11 combinations of caste and developmental  
135 stage from 1 or 3 colonies (table 1). Based on the concentrations estimated with the Bioanalyzer the  
136 larval libraries were prepared so as to contain equal quantities of RNA from each of the three larval stages  
137 2 - 4 and equal quantities per individual within each larval stage. The same was also true for pre-pupae  
138 and pupae within the pupal libraries.

### 139 *Sequencing & assembly*

140 The 27 libraries were sequenced on three lanes of an Illumina HiSeq 2500 system in rapid mode at  
141 the Edinburgh Genomics facility of the University of Edinburgh. After quality control and raw read  
142 processing, the reads were mapped to the *B. terrestris* transcriptome, BT\_transcriptome\_v2 (Colgan  
143 et al., 2011), using bwa\_0.6.1. Only reads which mapped uniquely were considered for further analysis.  
144 Counts per transcript were subsequently calculated for each library using custom scripts.

### 145 *Differential expression analysis*

146 The Blast2GO java program (Conesa et al., 2005) was used to annotate the transcriptome with gene  
147 descriptions and Gene Ontology (GO) terms (blastx against the nr database with  $e < 0.001$ ). Differential  
148 expression analyses were carried out with the DESeq package (1.16.0; Anders and Huber 2010) in R  
149 (3.1.1; Team 2012).

150 A neighbor-joining tree was created based on expression differences between each of the 27 libraries.  
151 The distance matrix for the tree was calculated with the DESeq package and contained euclidean distances  
152 between each library based on variance stabilization transformed counts. The tree was created with Phylip  
153 (3.695, Felsenstein 2005). A principle components analysis was performed on all adult libraries within  
154 the DESeq package on variance stabilisation transformed data. Euler diagrams were created with the R  
155 package venneuler (Wilkinson and Urbanek, 2011).

156 Transcripts with a total of 50 reads or less across all 27 libraries were removed before performing the  
157 differential expression (DE) analyses. All remaining transcripts were tested for differential expression in  
158 each comparison. For each DE analysis, standard comparisons were performed between two conditions on  
159 normalized count data and with dispersion accounted for. Only transcripts with a Benjamini-Hochberg  
160 corrected p value (FDR)  $< 0.05$  were considered as significantly, differentially expressed. For comparisons  
161 between castes within developmental stages, colonies were considered as replicates. No comparisons were

162 made against queen pupae, queen larvae or adult virgin queens, as in each case only one replicate existed.

163 These libraries were, however, included in comparisons of expression between developmental stages.

164 Gene function enrichment analyses (Fisher exact test) were carried out on DE transcripts with the  
165 R package topGO (2.16.0; Alexa and Rahnenfuhrer 2010). Enriched GO terms (FDR < 0.01) were  
166 subsequently summarised to meaningful clusters using Revigo (Supek et al., 2011). This method reduces  
167 redundancy of GO terms.

## 168 Results

### 169 *Assembly*

170 A total of 469.3 million 50 base pair, single-end reads were generated, ranging from 13.9 to 23.7 million  
171 reads per library. The reads mapped to the *Bombus terrestris* transcriptome at an average of 85.27%  
172 (75.25% to 92.47%) per library. The transcripts ranged in length from 101 to 26,110 bases (mean:  
173 1,102; median: 721; fig. 1). Average read depth across the 27 libraries ranged from 0 to 47,420 (mean:  
174 181; median: 16; fig. 1). All transcripts, to which a total of 50 or less reads (10,089, 27.8%) had  
175 been mapped across all libraries, were removed, leaving 26,265 (72.2%) transcripts for the differential  
176 expression analyses. The normalized counts per transcript ranged from 0 to 391,971 (median 34.41, mean  
177 247.81) per library.

### 178 *Overview of gene expression patterns*

179 All replicates, i.e. libraries from the same caste and developmental stage but from different colonies,  
180 showed low variation in their gene expression patterns and thus grouped together well in a neighbour-  
181 joining tree (fig. 2). The main clusters in the tree were formed by developmental stage (larvae, pupae  
182 and adults) rather than by caste. A differentiation in expression pattern between genders becomes more  
183 apparent in adults, where males form a distinct cluster. Within female adult castes a further clustering  
184 seems to have occurred. All reproductive workers and mother queens clustered together, and two of the  
185 workers with undetermined reproductive status ( $W_{Au8}$  and  $W_{Au11}$ ) formed a separate branch, while  
186 the adult virgin queen remained more distant to all other female adult groups. The adult worker with  
187 undetermined reproductive status from colony 9 ( $W_{Au9}$ ), on the other hand, grouped together with  
188 reproductive workers and mother queens. A principal component analysis (PCA) performed on all adult  
189 libraries indicated that  $W_{Au9}$  was indeed reproductive although ovaries had not been visible (fig. 3). In  
190 the analysis  $W_{Au9}$  clusters strongly with all reproductive workers and mother queens.  $W_{Au8}$  and  $W_{Au11}$   
191 form a distinct group, well separated from the reproductive workers and mother queens. This clustering  
192 pattern could mean that  $W_{Au9}$  was reproductive and ovaries had not yet been visible in dissection.  $W_{Au8}$



193 and  $W_{Au11}$  were most likely non-reproductive.

194 These conclusions were further supported by an over-representation of *Apis mellifera* reproductive  
195 genes (Cardoen et al., 2011) within  $W_{Au9}$  but not in  $W_{Au8}$  or  $W_{Au11}$ . The expression of the 299 genes,  
196 which were over-expressed in reproductive honey bee workers compared to non-reproductive workers, was  
197 significantly lower in  $W_{Au8}$  (median 122.8; mean 363.2) and  $W_{Au11}$  (median 117.2; mean 389.4) than all  
198 three of our reproductive workers ( $W_{Ar7}$ : median 194.0, mean 638.9;  $W_{Ar8}$ : median 212.3, mean 627.6;  
199  $W_{Ar9}$ : median 138.9, mean 457.0). These differences were significant compared to  $W_{Ar7}$  (compared to  
200  $W_{Au8}$ :  $p = 0.0045$ ; compared to  $W_{Au11}$ :  $p = 0.0083$ ) and  $W_{Ar8}$  (compared to  $W_{Au8}$ :  $p = 0.0080$ ;  
201 compared to  $W_{Au11}$ :  $p = 0.0018$ ; Mann-Whitney U test; fig. 4). Expression of the Cardoen reproductive  
202 genes was significantly higher in  $W_{Au9}$  (median: 196.5; mean: 542.5) than in both  $W_{Au8}$  and  $W_{Au11}$  ( $p$   
203 = 0.0238 & 0.0376 respectively; Mann-Whitney U test; fig. 4). For these reasons  $W_{Au9}$  was considered  
204 reproductive and  $W_{Au8}$  and  $W_{Au11}$  were classed as non-reproductive for all further analyses.

205 The patterns shown in the neighbour-joining tree (fig. 2) and PCA of adult castes (fig. 3) were  
206 reflected in the number of DE transcripts found between developmental stages and castes. From 6,289  
207 to 7,483 (mean 7,019) transcripts were differentially expressed between developmental stages. Only 71  
208 and 162 DE transcripts were found between males and workers within larvae and pupae respectively,  
209 while a mean of 4,114 DE transcripts were found within adult comparisons ranging from 111 between  
210 reproductive workers and mother queens to 8,706 between adult males and mother queens (fig. 5).

211 For some analyses of differential expression, colonies were not uniformly distributed, e.g. adult males  
212 (colonies 7, 9 & 11) versus non-reproductive workers (colonies 8 & 11). For these, ANCOVAs were  
213 performed to test for significant colony effects (see supplementary material). In only one out of 9 cases  
214 was a significant main effect of colony found. There were 5 cases where a significant interaction between  
215 colony and expression was found. In each of these cases a separate significant effect was still found for  
216 the important group difference: caste, developmental stage or gender. This means that any significant  
217 effects listed in the comparisons below can be attributed to differences in caste, gender or developmental  
218 stage rather than a colony effect.

### 219 *Developmental stages*

220 A total of 12,218 DE transcripts were recorded in the three comparisons between larvae, pupae and adults  
221 (fig. 6). As already suggested by the neighbour-joining tree (fig. 2), adults differed most greatly from  
222 the other two developmental stages, confirmed by 3,237 transcripts which were differentially expressed  
223 compared to both pupae and larvae. A Gene Ontology (GO) term enrichment analysis showed that  
224 a heightened cellular metabolism distinguishes larvae from pupae and adults. The three main clusters  
225 of significantly over-represented GO terms (Fisher's exact test, FDR <0.01) in a Revigo treemap were

226 "translation", "oxidative phosphorylation" and "ribosomal biogenesis" (fig. 7). Most over-represented  
227 GO terms among transcripts up-regulated in pupae either related to cell communication and movement,  
228 "signal transduction" and "cellular component organisation", or the development of morphological fea-  
229 tures, "anatomical structure morphogenesis" (fig. 8). Most enriched adult GO terms belonged to the  
230 supercluster "G-protein coupled receptor signaling pathway" (fig. 9). This cluster included sub-clusters  
231 such as, "phototransduction", "detection of stimulus" and "cell surface receptor signaling pathway", high-  
232 lighting the higher sensory capabilities and requirements of adults. 42.6% of larval, 58.7% of pupal and  
233 48.3% of adult DE transcripts either received no significant blast hit or were linked to genes of unknown  
234 function. Detailed results of the Fisher tests can be found in the supplementary material.

235 This test was repeated using lists of unique genes rather than transcript lists. All tendencies and the  
236 largest GO clusters remained unchanged. However, the number of significantly enriched GO terms was  
237 reduced. This was most likely due to the reduced number of genes in the test as a consequence of a high  
238 number of transcripts without an annotated gene match.

### 239 *Male versus worker larvae*

240 Within larvae only a relatively small group of transcripts proved to be differentially expressed between  
241 males and workers (32 and 39 up-regulated transcripts respectively). Within the list of male larvae DE  
242 transcripts *nose resistant to fluoxetine protein 6-like, nrf-6*, appeared six times with a fold change (FC)  
243 ranging from 3.86 - 25.34 and expression of 48 to 4,576 mean normalised counts (mnc; supplementary  
244 tables). Nrf-6 is a transmembrane protein present in the intestine of various invertebrates (Choy and  
245 Thomas, 1999; Yao et al., 2014) and has been reported as up-regulated in the gut of *Ostrinia nubilalis*  
246 larvae (Lepidoptera) in response to a bacterial toxin (Yao et al., 2014). The presence of a further  
247 transcript within this list which encodes *cytochrome p450 6k1-like* (BTT39618\_1; 2.07 FC; 1,682 mnc;  
248 supplementary tables) provides possible further evidence for an infection within the male larvae. Riddell  
249 et al. (2014) found in *B. terrestris* that the expression of 16 different cytochrome p450 transcripts was  
250 altered post infection.

251 *Takeout-like* (XP\_003397291.1; transcript BTT15842\_1) was also strongly up-regulated in male larvae  
252 compared to worker larvae (5.75 FC; 2,693 mnc; supplementary tables). A close homolog to this transcript  
253 (blastp: 68% identity, e-value  $3e^{-126}$ ) has been characterized for *A. mellifera* (Hagai et al., 2007). Takeout  
254 (to) was reported to be involved in the regulation of maturation in worker honey bees. In that study  
255 only adult workers were investigated so that any gender or developmental effects are as yet unknown for  
256 Hymenoptera. However, the *to* gene family is known to be over-expressed in adult *Drosophila* males,  
257 affecting courtship behaviour (Dauwalder et al., 2002).

258 The majority of the worker larvae DE genes (24 out of 39; 8 of the top 10 in terms of FC) were

259 either of unknown function or received no significant blast hits (supplementary tables). One *vitellogenin*  
260 transcript (BTT24408\_1; 4.35 FC; 62 mnc; supplementary tables) was over-expressed in worker larvae  
261 compared to male larvae.

### 262 *Male versus worker pupae*

263 Differentiation was somewhat greater between males and workers during the pupal phase compared to  
264 the larval phase. 128 transcripts were significantly up-regulated in male pupae and 34 in worker pupae.  
265 The pupal list contained a high number of uncharacterized transcripts: 84 (66%) male and 24 (71%)  
266 worker pupae transcripts (supplementary tables).

267 Six male DE transcripts coded for *tubulin* related genes (3  $\alpha$ -tubulin transcripts, 1  $\beta$ -tubulin transcript  
268 and 2 tubulin-tyrosine ligases; 6.28 - 490.54 FC; 56 - 1,200 mnc; supplementary tables). The tubulin-  
269 tyrosine ligase is involved in the post-transcriptional modification of  $\alpha$ -tubulin (Ersfeld et al., 1993), so  
270 it appears tubulin transcripts, especially  $\alpha$ , may be important for male pupal development. The same  
271 *vitellogenin* transcript up-regulated in worker larvae (BTT24408\_1) was also up-regulated in worker pupae  
272 compared to male pupae (5.83 FC; 29 mnc; supplementary tables).

### 273 *Fertility genes*

274 Within the comparisons between adult castes (males, reproductive workers, non-reproductive workers and  
275 mother queens), reproductive workers and mother queens were most similar with only 111 DE transcripts  
276 (64 up-regulated in reproductive workers and 47 in mother queens; fig. 5). Non-reproductive workers, on  
277 the other hand, were distinct from both mother queens (2,499 up-regulated in non-reproductive workers,  
278 2,817 in mother queens) and, to a lesser extent, reproductive workers (844 up-regulated in reproductive,  
279 810 in non-reproductive workers). The majority (791, 93.7%) of the transcripts up-regulated in reproduc-  
280 tive workers compared to non-reproductive workers were also up-regulated in mother queens compared to  
281 non-reproductive workers. As the common difference between non-reproductive and reproductive workers  
282 and between non-reproductive workers and mother queens is their fertility status, we have named these  
283 791 transcripts 'fertility genes' (fig. 10).

284 All differential expression values in this section are based on the comparison of reproductive and  
285 non-reproductive workers, although all transcripts were also up-regulated in mother queens versus non-  
286 reproductive workers. 267 (33.8%) of the fertility transcripts were of unknown function (1.78 - 336.18 FC;  
287 18 - 39,927 mnc; supplementary tables). A large number of transcripts were involved in protein synthesis  
288 activity: a total of 54 up-regulated gene transcripts contained the labels "transcription", "translation",  
289 "RNA polymerase", "ribosomal", "ubiquitin", "helicase" or "ribonucleoprotein" (1.85 - 11.68 FC; 68 -

290 29,132 mnc). Seven *tudor* transcripts, a gene known to be involved in the formation of female germ cells  
291 in *Drosophila* (Boswell and Mahowald, 1985), were significantly higher expressed in reproductive workers  
292 with a fold change ranging from 1.88 to 2.44 (144 - 491 mnc). 61 of the fertility transcripts (1.77 - 9.53  
293 FC; 12 - 9,973 mnc) were direct homologs of genes up-regulated in honey bee reproductive workers in a  
294 similar comparison (Cardoen et al., 2011). These transcripts encoded genes with functions such as oocyte  
295 meiosis, oocyte axis specification, oogenesis and female gonad development (supplementary tables).

296 The list also contained two *vitellogenin* (4.95 & 6.03 FC; 4,103 & 111,595 mnc) and four vitellogenin  
297 receptor transcripts (1.94 - 3.39 FC; 222 - 11,577 mnc). The two *vitellogenin* transcripts had, on average  
298 across all libraries, a total expression level of 45,294 mnc, making up 69.4% of all *vitellogenin* transcripts  
299 on average per individual (97.7% in mother queens and 98.4% in reproductive workers; fig. 11a, b).  
300 The *vitellogenin* transcripts (BTT24408\_1 and BTT40935\_1) are closely related to the 1,772 amino acid  
301 vitellogenin genes ACQ91623 and ACU00433 of *B. ignitus* and *B. hypocrita* respectively (table 2). These  
302 genes correspond to the conventional *Vg1* gene described by Morandin *et al.* (2014; blastp: E = 0.0, Id =  
303 33%). The four receptor transcripts corresponded to the two *B. terrestris* genes *vitellogenin receptor-like*  
304 *isoform 1* and *isoform 2* (XP\_003402703 and XP\_003402704).

305 *Vitellogenin* was, however, not restricted to female reproductive castes. The second highest ex-  
306 pressed *vitellogenin* transcript across all libraries, BTT07410\_1, constituted on average 28.1% of vitel-  
307 logenin transcripts. This transcript together with three further transcripts (BTT35710\_1, BTT41989\_1  
308 and BTT37349\_1) is associated with the *B. terrestris* gene XP\_003400264 (*vitellogenin-6-like*), which is  
309 1,514 amino acids in length and corresponds with the *Vg-like-A* gene described by Morandin *et al.* (2014;  
310 blastp: E = 0.0, Id = 44%; table 2). These four transcripts appear to be involved in development and  
311 independent of gender as they were up-regulated in all larvae and pupae samples compared to adults  
312 irrespective of caste and gender (fig. 11c). One *vitellogenin* transcript (BTT00708\_1) was significantly  
313 up-regulated in adults compared to pupae and larvae but was down-regulated by reproductive workers  
314 (significantly compared to male adults) and mother queens (significantly compared to non-reproductive  
315 workers and male adults; fig. 11d). This transcript is coded by the *B. terrestris* vitellogenin-like gene  
316 XP\_003393940, which is much shorter than the two previously discussed *vitellogenin* genes (319 amino  
317 acids) and is similar to *Vg-2* of *Apis mellifera* (blastp: 66% identity, e-value  $1e^{-142}$ ) and the *Vg-C-like*  
318 homolog described in Morandin *et al.* (2014; blastp: E =  $1e^{-134}$ , Id = 57%; table 2).

319 Seven  $\alpha$ -glucosidase transcripts were differentially expressed within the fertility genes (6.93 - 9.14  
320 FC; 16 - 35,260 mnc). An analysis of all 10  $\alpha$ -glucosidase transcripts within the *B. terrestris* transcrip-  
321 tome across all libraries showed raised expression levels for reproductive workers and mother queens  
322 compared to all other castes and developmental stages. Non-reproductive workers had the third high-  
323 est levels of the 11 combinations of caste and developmental stage but  $\alpha$ -glucosidase transcripts were 8

324 times more abundant in reproductive workers and mother queens (fig. 12). Four *glucose dehydrogenase*  
325 transcripts (BTT01220.1, BTT08099.1, BTT18258.1 & BTT20465.1), on the other hand, were down-  
326 regulated in mother queens and reproductive workers, although up-regulated in all adults compared to  
327 larvae and pupae (fig. 13). These transcripts all related to the *B. terrestris glucose dehydrogenase* gene  
328 XP\_003395668.1.

329 Interestingly, mean expression of the 10  $\alpha$ -*glucosidase* transcripts correlated significantly with mean  
330 expression of the two *vitellogenin* transcripts (BTT24408.1 and BTT40935.1), which were also up-  
331 regulated in the fertility genes ( $\rho = 0.7247$ ;  $p = 1.91 \times 10^{-5}$ ; Spearman's rho). Similarly, mean expression  
332 of the four *glucose-dehydrogenase* transcripts, down-regulated in fertility genes, significantly correlated  
333 with the down-regulated *vitellogenin* transcript (BTT00708.1;  $\rho = 0.7888$ ;  $p = 1.02 \times 10^{-5}$ ; Spearman's  
334 rho).

335 Two transcripts (BTT20241.1 & BTT33633.1; 67.16 & Inf FC; 5,528 & 37 mnc), which encode laccase-  
336 2-like, were up-regulated in reproductive versus non-reproductive workers but not in mother queens versus  
337 non-reproductive workers. Laccase 2 is a protein involved in the sclerotisation of extracellular structures  
338 in invertebrates (Arakane et al., 2005).

### 339 *Non-reproductive workers*

340 For the majority (465 out of 810; 57.4%) of the transcripts up-regulated in non-reproductive workers  
341 compared to reproductive workers the function was unknown (supplementary tables). 19 of the non-  
342 reproductive worker genes were direct homologs of genes up-regulated in non-reproductive *A. mellifera*  
343 workers (Cardoen et al., 2011). Eight of those (1.77 - 3.74 FC; 72 - 653 mnc) had been attributed  
344 to the effect of the queen mandibular pheromone (QMP) in a previous study (Grozinger et al. 2003;  
345 supplementary tables).

### 346 *Adult queens*

347 Transcripts, which were up-regulated in mother queens compared to both reproductive and non-  
348 reproductive workers, were considered 'queen genes' (fig. 10). The 40 queen transcripts ranged in fold  
349 change compared to reproductive workers from 1.68 to 8.87 (29 - 245,472 mnc; supplementary tables).  
350 Eleven of the transcripts (27.5%) were of unknown function. Most notable among the queen genes were  
351 5 transcripts relating to serine protease inhibitors, SPI (2.92 - 8.87 FC; 2,145 - 10,596 mnc). These five  
352 SPIs were expressed together at a mean of 27,758 mnc  $\pm$ 1,247 SEM in mother queens compared to only  
353 5,026 mnc in the virgin queen (fig. 14; supplementary tables). The second highest levels were found in  
354 non-reproductive workers (7,555 mnc  $\pm$ 1,527 SEM) followed by reproductive workers (6,435 mnc  $\pm$ 699

355 SEM).

### 356 *Adult males*

357 In males compared to non-reproductive workers 1,280 transcripts were up-regulated, of which 526 (41.1%)  
358 were of unknown function (supplementary tables). A high number of male transcripts (190), containing  
359 the tags "mitochond", "cytochrome", "pyruvate", "NADH dehydrogenase" or "quinone", were involved  
360 in the mitochondrial metabolism (1.85 - 41.66 FC; 8 - 62,872 mnc). 37 transcripts were involved in muscle  
361 development (*myosin*, *troponin*, *twitchin* and *titin*; 2.42 - 28.60 FC; 10 - 5,877mnc) and a further 16 in  
362 the fatty acid metabolism (1.94 - 202.24 FC; 6 - 3,935 mnc).

### 363 *Comparison with previous studies on *Bombus terrestris**

364 The top 10 transcripts up-regulated in larvae in the study carried out by Colgan et al. (2011) related  
365 to cuticle proteins, the storage protein hexamerin and the metabolic proteins carbonic anhydrase and  
366 cytochrome p450. In the present study 5 cuticle, 2 hexamerin (70c and 70b), 10 carbonic anhydrase and  
367 12 cytochrome p450 related transcripts were also up-regulated in larvae compared to pupae and adults.  
368 The 10 transcripts listed in Colgan et al. could be linked to one GO term (GO:0042302: "structural  
369 constituent of cuticle"), which was also attributed to 17 of the larvae transcripts (up-regulated relative  
370 to pupae and adults). In a further study a cuticle protein and hexamerin were also present in larvae  
371 but absent in adults; pupae were not included in the analysis (Pereboom et al., 2005). The *vitellogenin*  
372 transcript BTT07410\_1, which we found to be up-regulated in larvae and pupae, was also over-expressed  
373 in pupae in the Colgan et al. study (2011), however, not detected in larvae. All 7 of the GO terms, which  
374 were associated with the top 10 pupal genes in the Colgan et al. study (2011), were also present in our  
375 list of up-regulated pupae transcripts ( $p = 1.3 \times 10^{-4}$ , hypergeometric test).

376 In workers Colgan et al. (2011) found over-expressed genes associated with flight, defence and  
377 metabolism (*cytochrome p450*, *lipase* and  *$\alpha$ -glucosidase*). In the present study flight muscles were also  
378 over-represented in non-reproductive workers and the metabolism genes *lipase*, *cytochrome p450* and  
379  *$\alpha$ -glucosidase* were more highly expressed in workers than in males. 20 of the 36 GO terms associated  
380 with the worker transcripts in the Colgan *et al.* study were also found in the transcripts up-regulated in  
381 non-reproductive workers relative to adult males in the current study ( $p = 5.8 \times 10^{-9}$ , hypergeometric  
382 test). The genes differentially expressed between adult female castes and sub-castes in the Pereboom  
383 et al. study (2005), *60-S ribosomal protein*, *chymotrypsin*, *cytochrome oxidase*, *peroxiredoxin*, *fatty acyl*  
384 *CoA-desaturase* and *ATP synthase beta subunit*, could not be confirmed with our data.

385 Colgan et al. (2011) found transcripts of the flight muscle gene *titin* to be over-represented in male

386 adults, as well as several immunity genes. Many flight muscle proteins were also up-regulated in our  
387 study, however, we could not confirm the over-representation of immunity genes among the transcripts  
388 with known function. All 17 GO terms present in the top 10 male transcripts of the Colgan et al.  
389 study (2011) were also present in our list of male transcripts (up-regulated in adult males relative to  
390 non-reproductive workers;  $p = 2.3 \times 10^{-14}$ , hypergeometric test).

## 391 Discussion

392 We compared gene expression patterns both between developmental stages and between castes within  
393 each developmental stage for the buff-tailed bumble bee *Bombus terrestris*. The number of differentially  
394 expressed transcripts ranged from 71 between male and worker larvae to 8,706 between adult males and  
395 mother queens. We found gene expression patterns to differ more between developmental stages than  
396 between caste or gender. Genes up-regulated in larvae were associated with a high cellular metabolism,  
397 whereas in pupae over-expressed genes were associated with cell communication and the development of  
398 morphological features. Most of the over-represented GO terms in adults were related to the G-protein  
399 coupled receptor signaling pathway. G-proteins are cell-surface receptors, which respond to extra-cellular  
400 stimulants with an intracellular signal cascade (Dohlman, 2002; Strader et al., 1994).

401 The number of genes differentially expressed became progressively larger through the three develop-  
402 mental stages as each caste became more distinct. These findings suggest a comparatively low number  
403 of genes are required to create distinct morphological castes compared to the high number involved in  
404 distinct behaviours between adult castes. Gender grouped more strongly than caste as expression was  
405 less variable between adult males than within each of the female castes. Similar findings have been pre-  
406 sented for the social wasp *Vespula squamosa*, for which workers, queens and males clustered clearly into  
407 developmental stages (Hoffman and Goodisman, 2007). A study on the two fire ant species *Solenopsis*  
408 *invicta* and *S. richteri* also found expression patterns between developmental stages to differ more than  
409 between gender followed by caste and species (Ometto et al., 2011).

410 Our data confirmed, to some extent, previous findings for *B. terrestris* (Pereboom et al., 2005; Colgan  
411 et al., 2011). Several associations of gene functions with specific castes or developmental stages detected  
412 by Colgan et al. (2011) were also found in the present study. Discrepancies can be explained by, in  
413 contrast to our study, a lack of replication in the 2011 study or a difference in analysis structure; Colgan  
414 et al. (2011) implemented R-STAT (Stekel et al., 2000) to calculate differential expression of a contig  
415 within all libraries, whereas we performed specific pairwise comparisons. Little overlap could be found  
416 with an older study on caste determination in *B. terrestris* (Pereboom et al., 2005). However, due to  
417 the method implemented in that study, suppression subtractive hybridisation, only a few differentially



418 expressed genes could be isolated, and also, due to a different focus, fewer comparisons were performed  
419 than in our study (Pereboom et al., 2005).

#### 420 *Reproductive workers closely resemble queens*

421 Towards the end of a bumble bee colony cycle a queen-worker conflict develops, in which reproductive  
422 workers compete with the mother queen for male parentage (Alaux et al., 2004; Bloch, 1999). The ex-  
423 pression patterns observed in this study support our hypothesis that when bumble bee workers become  
424 reproductive they would, in comparison to highly eusocial species, more strongly resemble queens in  
425 their behaviour and physiology due to the more plastic nature of worker castes in bumble bees. Of all  
426 adult expression patterns, those of reproductive workers and mother queens were most similar, in fact  
427 more similar than between reproductive and non-reproductive workers. Only 111 transcripts differed  
428 significantly between reproductive workers and mother queens compared to 1,654 between reproduc-  
429 tive and non-reproductive workers. Non-reproductive workers differed from mother queens even more  
430 strongly (5,316 DE transcripts). These findings are in strong contrast to patterns found in two highly  
431 eusocial hymenopteran species. In *A. mellifera* over 2,000 genes differed significantly in both compar-  
432 isons between queens and either reproductive or non-reproductive workers; the expression of only 221  
433 genes differed significantly between the two worker castes (Grozing et al., 2007). Similarly, 2,785 genes  
434 were significantly up- or down-regulated between queens and reproductive workers in the myrmicine ant  
435 *Temnothorax longispinosus* compared to only 571 between reproductive and non-reproductive workers  
436 (Feldmeyer et al., 2014). Feldmeyer *et al.* (2014) suggested the high similarity between reproductive and  
437 non-reproductive workers in these two hymenopteran taxa indicates that a relatively low number of genes  
438 are required for ovary activation and egg laying compared to the high number involved in further physio-  
439 logical or behavioural differences which exist between queens and workers. Based on this assumption, our  
440 data indicate a greater similarity in behaviour and general physiology between bumble bee queens and  
441 reproductive workers than is the case for honey bees or myrmicine ants. The division of labour among  
442 bumble bees is not as clearly temporally or morphologically fixed as in the highly eusocial honey bees  
443 and most ants, indicating the capability of individual bumble bee workers to flexibly adapt their current  
444 role (e.g. from forager to nurse) to changing conditions within a colony at any given time (Cameron,  
445 1989). In honey bees a shift towards a more 'queen-like' expression pattern was recorded in reproductive  
446 workers (Grozing et al., 2007); but it is possible that the more flexible nature of the bumble bee worker  
447 roles in our study allowed a much stronger shift in behaviour and physiology, allowing the reproductive  
448 workers to more strongly resemble a queen.



449 *Male expression patterns are most distinct among adults*

450 Males, in contrast to both queens and all workers, do not possess a sting and their antennae contain  
451 an additional segment. Their sexual organs naturally also differ. It was therefore surprising that the  
452 expression of comparatively few transcripts significantly differed during development. Within the larval  
453 stage no clear clusters could be formed based on expression patterns, and only 71 transcripts differed  
454 significantly in their expression levels between males and workers. During the pupal stage, when mor-  
455 phological features are being generated, expression patterns became more distinct with 162 transcripts  
456 differentially expressed. However, it was only in adulthood that the expression pattern of males became  
457 truly distinct from all other castes. In male adults between 2,411 and 8,706 transcripts were either up-  
458 or down-regulated compared to the three adult female castes mother queen, reproductive worker and  
459 non-reproductive worker. This indicates that a much greater number of genes may be required to control  
460 behaviour and the physiology of reproduction than to develop morphologies.

461 A high number (69; 59.5%) of the pupal transcripts up-regulated in male pupae, and therefore likely  
462 to contain some genes linked to the development of the male morphology, were of unknown function.  
463 The six  $\alpha$ - and  $\beta$ -*tubulin* transcripts, which were over-represented in male pupae, are possibly linked to  
464 spermatogenesis as both  $\alpha$ 2- and  $\beta$ -*tubulin* are known to be testis specific in *Drosophila* (Theurkauf et al.,  
465 1986; Kempfues et al., 1979). 190 transcripts were involved in mitochondrial processes and a further 37  
466 were associated with genes linked to muscle development. These 37 transcripts related to the proteins  
467 myosin, troponin, twitchin and titin, which are all integral parts of insect muscles (Hooper and Thuma,  
468 2005). In their mating flights males have been recorded as covering significantly larger distances than  
469 workers from the same colony (Kraus et al., 2009). The apparent greater need for muscle development  
470 and higher energy levels in males compared to workers are possibly linked to their greater flight distances.

471 *Vitellogenin*

472 Vitellogenin was originally thought to be limited to reproductive egg laying females due to its function as a  
473 yolk precursor in all oviparous animals, though it is now known to fulfil various functions in hymenopterans  
474 (Amdam et al., 2003). The reproductive ground plan model proposed by Amdam et al. (2004) describes  
475 how pleiotropic associations of reproductive genes, above all vitellogenin, with genes that control sensory  
476 perception, longevity and foraging behaviour have been utilised to control behaviour patterns in honey  
477 bee worker sub-castes.

478 Previously only one vitellogenin gene had been described for honey bees, which is differentially ex-  
479 pressed in female castes (Amdam et al., 2012). However, in a more recent study on *Formica* ants four  
480 vitellogenin homologs were found within the genome of all ant and bee species included in the study

481 (Morandin et al., 2014). These vitellogenin homologs were classed as conventional vitellogenin (*Vg-*  
482 *1*), *Vg-like-A*, *Vg-like-B* and *Vg-like-C*, which were expressed at different levels and differently between  
483 queens and workers. Four copies of *Vg-1* have been found in *Solenopsis invicta* (Wurm et al., 2011) and  
484 *Temnothorax longispinosus* (Feldmeyer et al., 2014) and two in *Pogonomyrmex barbatus* (Corona et al.,  
485 2013). In each of these cases, the gene copies showed differential expression between adult female castes.

486 Here we have found only one copy of *Vg-1* and two further vitellogenin genes which are closely related  
487 to *Vg-like-A* and *Vg-like-C*. *Vg-1*, as in *Formica* adults (Morandin et al., 2014), was the highest expressed  
488 of the three vitellogenin genes discovered in this study. We found *Vg-1* to be highly up-regulated in mother  
489 queens and reproductive workers compared to all other castes and developmental stages, which suggests  
490 it has maintained its conventional function in reproductive egg-laying females for *B. terrestris*. This  
491 also appeared to be the case for 3 out of 7 *Formica* species, in which *Vg-1* was up-regulated in queens  
492 compared to workers (Morandin et al., 2014). Workers were not grouped according to reproductive status  
493 in the Morandin *et al.* study (2014), which could explain the lack of significant differences between castes  
494 in more than 3 species. The comparison of expression between queens and workers for *Vg-A-like* differed  
495 among *Formica* species (up-regulated in queens for 3 and in workers for 1 species), (Morandin et al.,  
496 2014). In *B. terrestris* the homolog of *Vg-A-like*, XP\_003400264, appears to play a lesser role in adults,  
497 as it was up-regulated in larvae and pupae of both genders compared to adults. Expression of *Vg-C-like*  
498 was significantly higher in workers than queens in all 7 *Formica* species (Morandin et al., 2014). In the  
499 current study the homolog of *Vg-C-like*, XP\_003393940, was also down-regulated in mother queens but  
500 also in reproductive workers compared to higher levels in non-reproductive workers and adult males.

501 Here we have shown that three copies of vitellogenin genes are not only differentially expressed between  
502 adult females castes as shown for other hymenopteran taxa (Amdam et al., 2004; Morandin et al., 2014;  
503 Wurm et al., 2011; Feldmeyer et al., 2014; Corona et al., 2013), but that they are differentially expressed  
504 across all adult castes and between developmental stages.

### 505 *Carbohydrate processing enzymes*

506 We found the expression of two carbohydrate processing enzymes to be differentially expressed among  
507 adult castes. Expression of  $\alpha$ -glucosidase was almost exclusively restricted to female adults but with  
508 levels eight times higher in mother queens and reproductive workers than in non-reproductive workers.  
509 This is in contrast to honey bees for which  $\alpha$ -glucosidase is down-regulated in reproductive compared to  
510 non-reproductive honey bee workers (Cardoen et al., 2011). In honey bees  $\alpha$ -glucosidase catalyses the  
511 splitting of the sucrose present in nectar in the production of honey (Kubota et al., 2004; Ohashi et al.,  
512 1999). The apparent restriction of this protein to reproductive workers and mother queens may indicate  
513 a different role for this protein in *B. terrestris* compared to honey bees. *Glucose dehydrogenase*, on the

514 other hand, was present in all *B. terrestris* adults but was down-regulated in reproductive workers and  
515 mother queens. The similar protein glucose oxidase is specifically found in the hypopharyngeal gland of  
516 forager honey bees and converts the glucose of nectar to gluconic acid and hydrogen peroxide in honey  
517 production (Ohashi et al., 1999). Glucose dehydrogenase may perform a similar function in *B. terrestris*  
518 as it also catalyses the oxidation of glucose to gluconic acid but without the by-product hydrogen peroxide  
519 (Bak, 1967). Expression of  $\alpha$ -glucosidase significantly correlated positively with *Vg-1* while expression  
520 patterns of *glucose dehydrogenase* significantly correlated positively with *Vg-C-like*. These correlations  
521 indicate interactions between *vitellogenin* and the two carbohydrate enzymes, which may be associated  
522 with distinct foraging preferences among adult castes.

### 523 *Further caste specific genes*

524 One highly represented gene in the list of transcripts over-expressed in mother queens compared to  
525 reproductive workers was serine protease inhibitor. Serine proteases have been detected in the venom  
526 of a variety of Hymenoptera species (Hoffman and Jacobson, 1996; Winningham et al., 2004). One  
527 possibility is that serine protease inhibitor was produced to counteract the effect of stings, either as a  
528 reaction to sting attacks or as a preventative measure. This could be linked to the high aggression shown  
529 towards a bumble bee queen by workers late in a colony cycle often resulting in her death (Bourke and  
530 Ratnieks, 2001).

531 Workers can become reproductive in queenright conditions, but whether workers or queens con-  
532 trol worker reproduction is unresolved (Alaux et al., 2007). Intriguingly we found eight transcripts  
533 up-regulated in non-reproductive individuals (BTT06229 1, BTT09963 1, BTT20486 1, BTT15870 1,  
534 BTT22989 1, BTT27276 1, BTT17949 1 and BTT09790 1) whose expression is believed to be regu-  
535 lated by queen mandibular pheromone in *Apis mellifera* and where expression shows similar patterns  
536 (Grozinger et al., 2003; Cardoen et al., 2011). It is clear that further research is needed to understand  
537 the relationship between pheromonal signalling and ovary development (Amsalem et al., 2009).

538 In each of the caste comparisons performed in this study large numbers of differentially expressed  
539 transcripts either could not be associated with any known gene or were related to genes with so far  
540 unknown function. These range from 1,636 to 2,609 (32.0% - 54.4%) up-regulated transcripts when com-  
541 paring between developmental stages. The number of differentially expressed transcripts was much lower  
542 between male and worker larvae (34 & 39) and pupae (128 & 34), but still the majority of these transcripts  
543 (58.7%) were of unknown function. 267 of the 791 fertility transcripts, i.e. up-regulated in reproductive  
544 workers and mother queens compared to non-reproductive workers, belonged to uncharacterised genes,  
545 while 465 and 526 transcripts in the comparison between non-reproductive workers and adult males were  
546 of unknown function. Clearly, further research is required in these areas.

## 547 **Conclusions**

548 We conducted the first large scale RNA-seq analysis into caste differentiation within the genus *Bombus*, for  
549 which eusociality can be considered intermediate between that found in primitively eusocial taxa such as  
550 the paper wasp and highly eusocial species like the honey bee or most ants. As in other similar studies on  
551 eusocial hymenopterans, a high number of genes were differentially expressed in all comparisons between  
552 castes, genders and developmental stages. Significant overlaps with analyses on higher eusocial taxa  
553 exist in terms of overall expression patterns as well as specific genes. One striking difference between *B.*  
554 *terrestris* and higher eusocial hymenopterans is how much more closely a bumble bee reproductive worker  
555 resembles the queen regarding its gene expression. Further research may be able to determine whether  
556 this finding is restricted to *B. terrestris* or if it is linked to the more plastic nature of worker sub-castes in  
557 bumble bee taxa in general. The annotation of many unknown genes, which were differentially expressed  
558 in our analysis, and further research on *B. terrestris* following the imminent release of the genome will  
559 help us to better understand how distinct castes are created, maintained or altered within this important  
560 species.

## 561 **Acknowledgements**

562 This study was funded by a NERC Biomolecular Analysis Facility research grant (NBAF 829). Illu-  
563 mina library preparation, sequencing and bioinformatics were carried out by Edinburgh Genomics, The  
564 University of Edinburgh. Edinburgh Genomics is partly supported through core grants from NERC  
565 (R8/H10/56), MRC (MR/K001744/1) and BBSRC (BB/J004243/1). M.C.H. is funded by a NERC PhD  
566 research grant. We would like to thank 3 reviewers and the editor for their useful comments on an earlier  
567 version of the paper.

## 568 References

- 569 Alaux, C., Boutot, M., Jaisson, P., and Hefetz, A. (2007). Reproductive plasticity in bumblebee workers  
570 (*Bombus terrestris*)—reversion from fertility to sterility under queen influence. *Behavioral Ecology and*  
571 *Sociobiology*, 62(2):213–222.
- 572 Alaux, C., Savarit, F., Jaisson, P., and Hefetz, A. (2004). Does the queen win it all? Queen–worker conflict  
573 over male production in the bumblebee, *Bombus terrestris*. *Naturwissenschaften*, 91(8):400–403.
- 574 Alexa, A. and Rahnenfuhrer, J. (2010). topGO: Enrichment analysis for Gene Ontology.
- 575 Amdam, G. V., Fennern, E., and Havukainen, H. (2012). Vitellogenin in Honey Bee Behavior and  
576 Lifespan. In Galizia, C. G., Eisenhardt, D., and Giurfa, M., editors, *Honeybee Neurobiology and*  
577 *Behavior*, pages 17–29. Springer Netherlands.
- 578 Amdam, G. V., Norberg, K., Fondrk, M. K., and Page, R. E. (2004). Reproductive ground plan may  
579 mediate colony-level selection effects on individual foraging behavior in honey bees. *Proceedings of the*  
580 *National Academy of Sciences of the United States of America*, 101(31):11350–11355.
- 581 Amdam, G. V., Norberg, K., Hagen, A., and Omholt, S. W. (2003). Social exploitation of vitellogenin.  
582 *Proceedings of the National Academy of Sciences*, 100(4):1799–1802.
- 583 Amsalem, E., Twele, R., Francke, W., and Hefetz, A. (2009). Reproductive competition in the bumble-  
584 bee *Bombus terrestris*: do workers advertise sterility? *Proceedings of the Royal Society B: Biological*  
585 *Sciences*, 276(1660):1295–1304.
- 586 Anders, S. and Huber, W. (2010). Differential expression analysis for sequence count data. *Genome*  
587 *Biology*, 11(10):R106.
- 588 Andersson, M. (1984). The Evolution of Eusociality. *Annual Review of Ecology and Systematics*, 15:165–  
589 189.
- 590 Arakane, Y., Muthukrishnan, S., Beeman, R. W., Kanost, M. R., and Kramer, K. J. (2005). Laccase 2  
591 is the phenoloxidase gene required for beetle cuticle tanning. *Proceedings of the National Academy of*  
592 *Sciences of the United States of America*, 102(32):11337–11342.
- 593 Bak, T.-G. (1967). Studies on glucose dehydrogenase of *Aspergillus oryzae*: II. Purification and physical  
594 and chemical properties. *Biochimica et Biophysica Acta (BBA) - Enzymology*, 139(2):277–293.
- 595 Bloch, G. (1999). Regulation of queen–worker conflict in bumble bee (*Bombus terrestris*) colonies. *Pro-*  
596 *ceedings of the Royal Society of London B: Biological Sciences*, 266(1437):2465–2469.
- 597 Boswell, R. E. and Mahowald, A. P. (1985). tudor, a gene required for assembly of the germ plasm in  
598 *Drosophila melanogaster*. *Cell*, 43(1):97–104.
- 599 Bourke, A. F. G. and Ratnieks, F. L. W. (2001). Kin-selected conflict in the bumble-bee *Bombus terrestris*  
600 (Hymenoptera: Apidae). *Proceedings of the Royal Society of London. Series B: Biological Sciences*,  
601 268(1465):347–355.
- 602 Buckingham, E. N. (1911). Division of Labor among Ants. *Proceedings of the American Academy of Arts*  
603 *and Sciences*, 46(18):425–508.
- 604 Cameron, S. A. (1989). Temporal Patterns of Division of Labor among Workers in the Primitively  
605 Eusocial Bumble Bee, *Bombus griseocollis* (Hymenoptera: Apidae)1. *Ethology*, 80(1-4):137–151.
- 606 Cardoen, D., Wenseleers, T., Ernst, U. R., Danneels, E. L., Laget, D., De Graaf, D. C., Schoofs, L.,  
607 and Verleyen, P. (2011). Genome-wide analysis of alternative reproductive phenotypes in honeybee  
608 workers. *Molecular Ecology*, 20(19):4070–4084.
- 609 Choy, R. K. M. and Thomas, J. H. (1999). Fluoxetine-Resistant Mutants in *C. elegans* Define a Novel  
610 Family of Transmembrane Proteins. *Molecular Cell*, 4(2):143–152.

- 611 Cnaani, J., Borst, D. W., Huang, Z. Y., Robinson, G. E., and Hefetz, A. (1997). Caste Determination  
612 in *Bombus terrestris*: Differences in Development and Rates of JH Biosynthesis between Queen and  
613 Worker Larvae. *Journal of Insect Physiology*, 43(4):373–381.
- 614 Colgan, T. J., Carolan, J. C., Bridgett, S. J., Sumner, S., Blaxter, M. L., and Brown, M. J. (2011).  
615 Polyphenism in social insects: insights from a transcriptome-wide analysis of gene expression in the  
616 life stages of the key pollinator, *Bombus terrestris*. *BMC Genomics*, 12(1):623.
- 617 Conesa, A., Götz, S., García-Gómez, J. M., Terol, J., Talón, M., and Robles, M. (2005). Blast2go: a  
618 universal tool for annotation, visualization and analysis in functional genomics research. *Bioinformatics*,  
619 21(18):3674–3676.
- 620 Corona, M., Libbrecht, R., Wurm, Y., Riba-Grognuz, O., Studer, R. A., and Keller, L. (2013). Vitellogenin  
621 Underwent Subfunctionalization to Acquire Caste and Behavioral Specific Expression in the Harvester  
622 Ant *Pogonomyrmex barbatus*. *PLoS Genet*, 9(8):e1003730.
- 623 Dauwalder, B., Tsujimoto, S., Moss, J., and Mattox, W. (2002). The *Drosophila* takeout gene is regulated  
624 by the somatic sex-determination pathway and affects male courtship behavior. *Genes & Development*,  
625 16(22):2879–2892.
- 626 Detrain, C. and Pasteels, J. M. (1992). Caste polyethism and collective defense in the ant, *Pheidole*  
627 *pallidula*: the outcome of quantitative differences in recruitment. *Behavioral Ecology and Sociobiology*,  
628 29(6):405–412.
- 629 Dohlman, H. G. (2002). G Proteins and Pheromone Signaling. *Annual Review of Physiology*, 64(1):129–  
630 152.
- 631 Ersfeld, K., Wehland, J., Plessmann, U., Dodemont, H., Gerke, V., and Weber, K. (1993). Characteriza-  
632 tion of the tubulin-tyrosine ligase. *The Journal of Cell Biology*, 120(3):725–732.
- 633 Feldmeyer, B., Elsner, D., and Foitzik, S. (2014). Gene expression patterns associated with caste and  
634 reproductive status in ants: worker-specific genes are more derived than queen-specific ones. *Molecular*  
635 *Ecology*, 23(1):151–161.
- 636 Felsenstein, J. (2005). PHYLIP (Phylogeny Inference Package) version 3.6. *Distributed by the author.*  
637 *Department of Genome Sciences, University of Washington, Seattle.*
- 638 Grozinger, C. M., Fan, Y., Hoover, S. E. R., and Winston, M. L. (2007). Genome-wide analysis reveals  
639 differences in brain gene expression patterns associated with caste and reproductive status in honey  
640 bees (*Apis mellifera*). *Molecular Ecology*, 16(22):4837–4848.
- 641 Grozinger, C. M., Sharabash, N. M., Whitfield, C. W., and Robinson, G. E. (2003). Pheromone-mediated  
642 gene expression in the honey bee brain. *Proceedings of the National Academy of Sciences*, 100(suppl  
643 2):14519–14525.
- 644 Hagai, T., Cohen, M., and Bloch, G. (2007). Genes encoding putative Takeout/juvenile hormone binding  
645 proteins in the honeybee (*Apis mellifera*) and modulation by age and juvenile hormone of the takeout-  
646 like gene GB19811. *Insect Biochemistry and Molecular Biology*, 37(7):689–701.
- 647 Hoffman, D. R. and Jacobson, R. S. (1996). Allergens in Hymenoptera venom XXVII: Bumblebee venom  
648 allergy and allergens. *Journal of Allergy and Clinical Immunology*, 97(3):812–821.
- 649 Hoffman, E. A. and Goodisman, M. A. (2007). Gene expression and the evolution of phenotypic diversity  
650 in social wasps. *BMC Biology*, 5(1):23.
- 651 Hooper, S. L. and Thuma, J. B. (2005). Invertebrate Muscles: Muscle Specific Genes and Proteins.  
652 *Physiological Reviews*, 85(3):1001–1060.
- 653 Kempthues, K. J., Raff, R. A., Kaufman, T. C., and Raff, E. C. (1979). Mutation in a structural gene for  
654 a beta-tubulin specific to testis in *Drosophila melanogaster*. *Proceedings of the National Academy of*  
655 *Sciences*, 76(8):3991–3995.



- 656 Kraus, F. B., Wolf, S., and Moritz, R. F. A. (2009). Male flight distance and population substructure in  
657 the bumblebee *Bombus terrestris*. *Journal of Animal Ecology*, 78(1):247–252.
- 658 Kubota, M., Tsuji, M., Nishimoto, M., Wongchawalit, J., Okuyama, M., Mori, H., Matsui, H., Surarit,  
659 R., Svasti, J., Kimura, A., and Chiba, S. (2004). Localization of alpha-Glucosidases I, II, and III  
660 in Organs of European Honeybees, *Apis mellifera* L., and the Origin of alpha-Glucosidase in Honey.  
661 *Bioscience, Biotechnology, and Biochemistry*, 68(11):2346–2352.
- 662 Morandin, C., Havukainen, H., Kulmuni, J., Dhaygude, K., Trontti, K., and Helanterä, H. (2014). Not  
663 Only for Egg Yolk—Functional and Evolutionary Insights from Expression, Selection, and Structural  
664 Analyses of Formica Ant Vitellogenins. *Molecular Biology and Evolution*, 31(8):2181–2193.
- 665 Nipitwattanaphon, M., Wang, J., Ross, K. G., Riba-Grognuz, O., Wurm, Y., Khurewathanakul, C.,  
666 and Keller, L. (2014). Effects of ploidy and sex-locus genotype on gene expression patterns in  
667 the fire ant *Solenopsis invicta*. *Proceedings of the Royal Society of London B: Biological Sciences*,  
668 281(1797):20141776.
- 669 Ohashi, K., Natori, S., and Kubo, T. (1999). Expression of amylase and glucose oxidase in the hypopharyngeal gland with an age-dependent role change of the worker honeybee (*Apis mellifera* L.). *European Journal of Biochemistry*, 265(1):127–133.
- 672 Ometto, L., Shoemaker, D., Ross, K. G., and Keller, L. (2011). Evolution of Gene Expression in Fire  
673 Ants: The Effects of Developmental Stage, Caste, and Species. *Molecular Biology and Evolution*,  
674 28(4):1381–1392.
- 675 Pereboom, J. J. M., Jordan, W. C., Sumner, S., Hammond, R. L., and Bourke, A. F. G. (2005). Differential  
676 gene expression in queen–worker caste determination in bumble-bees. *Proceedings of the Royal Society B: Biological Sciences*, 272(1568):1145–1152.
- 678 Prys-Jones, O. E. and Corbet, S. A. (1987). *Bumblebees*. Cambridge University Press.
- 679 Reeve, H. K., Starks, P. T., Peters, J. M., and Nonacs, P. (2000). Genetic support for the evolutionary  
680 theory of reproductive transactions in social wasps. *Proceedings of the Royal Society B: Biological Sciences*, 267(1438):75–79.
- 682 Riddell, C., Garces, J. D. L., Adams, S., Barribeau, S. M., Twell, D., and Mallon, E. (2014). Differential  
683 gene expression and alternative splicing in insect immune specificity. *bioRxiv*, page 002709.
- 684 Stekel, D. J., Git, Y., and Falciani, F. (2000). The Comparison of Gene Expression from Multiple cDNA  
685 Libraries. *Genome Research*, 10(12):2055–2061.
- 686 Strader, C. D., Fong, T. M., Tota, M. R., Underwood, D., and Dixon, R. A. F. (1994). Structure and  
687 Function of G Protein-Coupled Receptors. *Annual Review of Biochemistry*, 63(1):101–132.
- 688 Sumner, S., Pereboom, J. J. M., and Jordan, W. C. (2006). Differential gene expression and phenotypic  
689 plasticity in behavioural castes of the primitively eusocial wasp, *Polistes canadensis*. *Proceedings of the Royal Society B: Biological Sciences*, 273(1582):19–26.
- 691 Supek, F., Bošnjak, M., Škunca, N., and Šmuc, T. (2011). REVIGO Summarizes and Visualizes Long  
692 Lists of Gene Ontology Terms. *PLoS ONE*, 6(7):e21800.
- 693 Team, R. C. (2012). R: A language and environment for statistical computing.
- 694 Theurkauf, W. E., Baum, H., Bo, J., and Wensink, P. C. (1986). Tissue-specific and constitutive alpha-tubulin genes of *Drosophila melanogaster* code for structurally distinct proteins. *Proceedings of the National Academy of Sciences*, 83(22):8477–8481.
- 697 Wilkinson, L. and Urbanek, S. (2011). Venneuler: Venn and Euler Diagrams. *R package version*, 1-1.
- 698 Winningham, K. M., Fitch, C. D., Schmidt, M., and Hoffman, D. R. (2004). Hymenoptera venom protease  
699 allergens. *Journal of Allergy and Clinical Immunology*, 114(4):928–933.

- 700 Wurm, Y., Wang, J., Riba-Grognuz, O., Corona, M., Nygaard, S., Hunt, B. G., Ingram, K. K., Falquet,  
701 L., Nipitwattanaphon, M., Gotzek, D., Dijkstra, M. B., Oettler, J., Comtesse, F., Shih, C.-J., Wu,  
702 W.-J., Yang, C.-C., Thomas, J., Beaudoin, E., Pradervand, S., Flegel, V., Cook, E. D., Fabbretti, R.,  
703 Stockinger, H., Long, L., Farmerie, W. G., Oakey, J., Boomsma, J. J., Pamilo, P., Yi, S. V., Heinze,  
704 J., Goodisman, M. A. D., Farinelli, L., Harshman, K., Hulo, N., Cerutti, L., Xenarios, I., Shoemaker,  
705 D., and Keller, L. (2011). The genome of the fire ant *Solenopsis invicta*. *Proceedings of the National*  
706 *Academy of Sciences*, 108(14):5679–5684.
- 707 Yao, J., Buschman, L. L., Lu, N., Khajuria, C., and Zhu, K. Y. (2014). Changes in Gene Expression in  
708 the Larval Gut of *Ostrinia nubilalis* in Response to *Bacillus thuringiensis* Cry1ab Protoxin Ingestion.  
709 *Toxins*, 6(4):1274–1294.



## 710 **Data accessibility**

711 All sequence data for this study are archived at European Genome-phenome Archive (EGA); accession  
712 number EGAS00001001169. Alignment files, raw read count lists, neighbor-joining tree files and the  
713 DESeq script are archived on Dryad (doi:10.5061/dryad.sp048). ANCOVA results, GO-analysis results  
714 and lists of differentially expressed transcripts are available as Supporting Information.

## 715 **Author contributions**

716 All three authors developed the project idea, designed the experiment and were involved in the interpre-  
717 tation of data and finalisation of the manuscript. M.C.H. performed the experiment, analysed the data  
718 and drafted the manuscript.

719 *Figures*

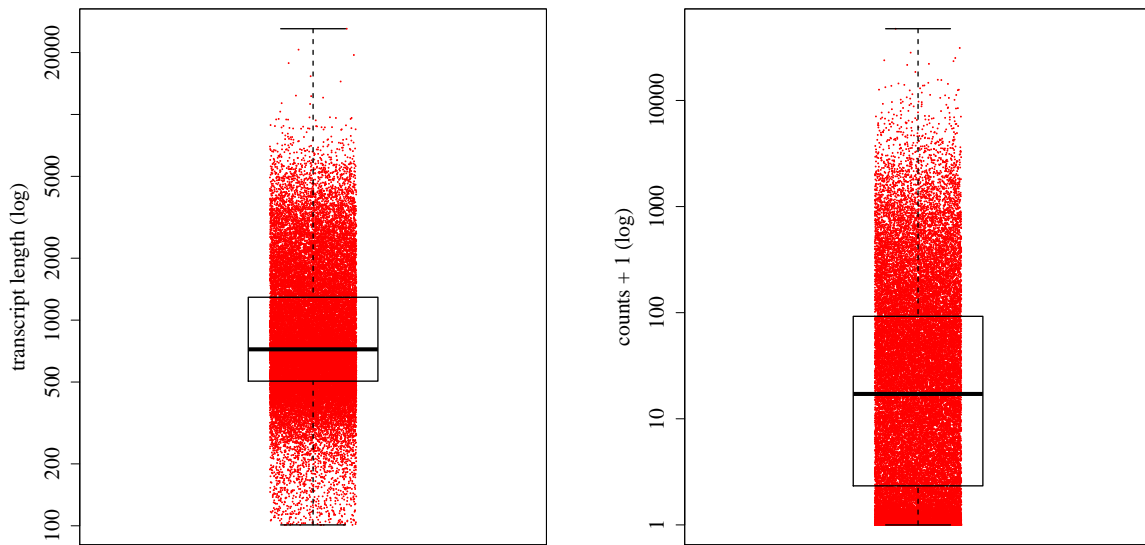

Figure 1: Range of transcript length in the transcriptome used for the assembly (left) and the average read depth per transcript across 27 libraries as raw read counts plus 1 (right). A log scale is used in both plots.

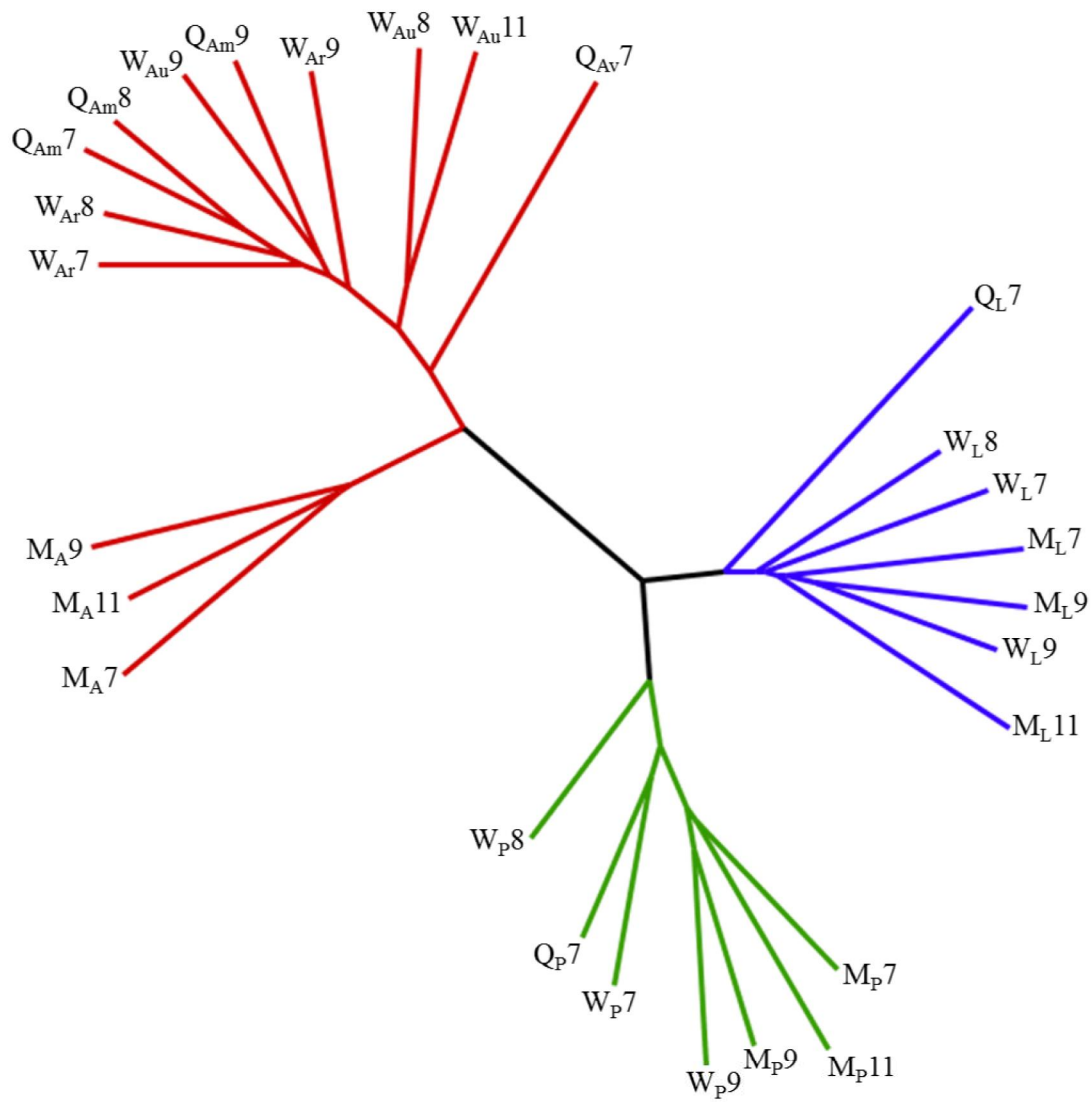

Figure 2: Neighbour-joining tree representing relationships between colonies, developmental stages, genders and castes based on expression pattern. Distances are euclidean and based on variance stabilization transformed counts. Numbers represent colonies; M = male; Q = queen; W = worker; L = larva; P = pupa; A = adult; r = reproductive; u = undetermined reproductive status; m = mother; v = virgin.

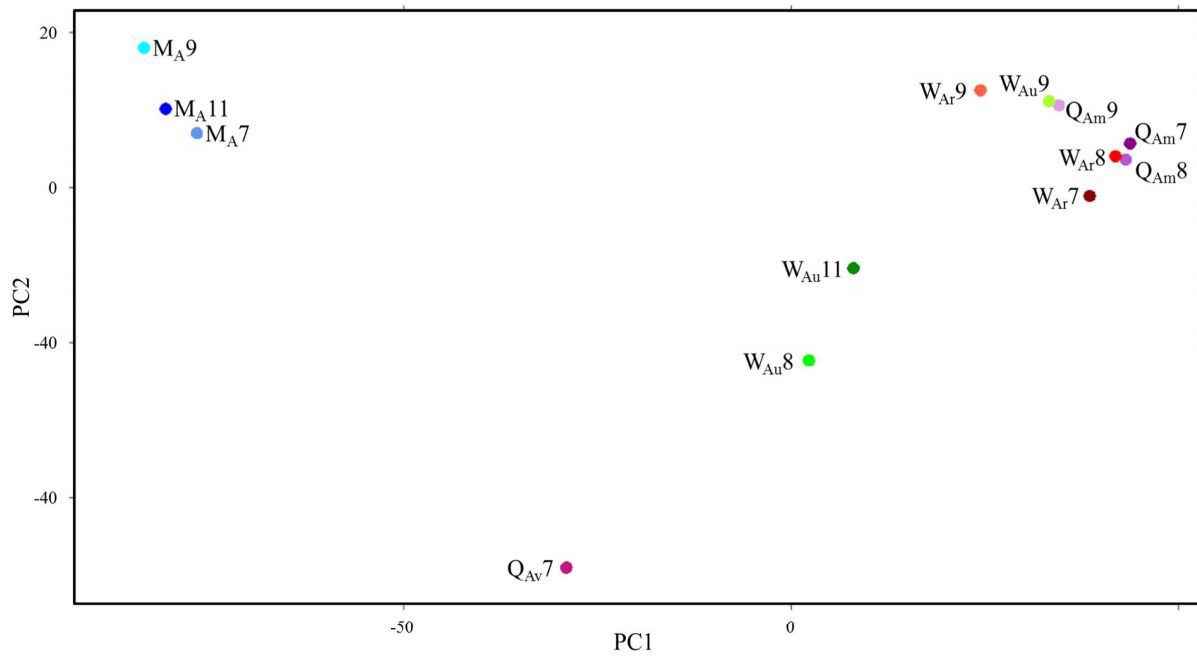

Figure 3: A principle components analysis of expression patterns among adult castes. The first two components explain 75.8% of variance. Distances are euclidean and based on variance stabilization transformed counts. Numbers represent colonies; M = male; Q = queen; W = worker; L = larva; P = pupa; A = adult; r = reproductive; u = undetermined reproductive status; m = mother; v = virgin.

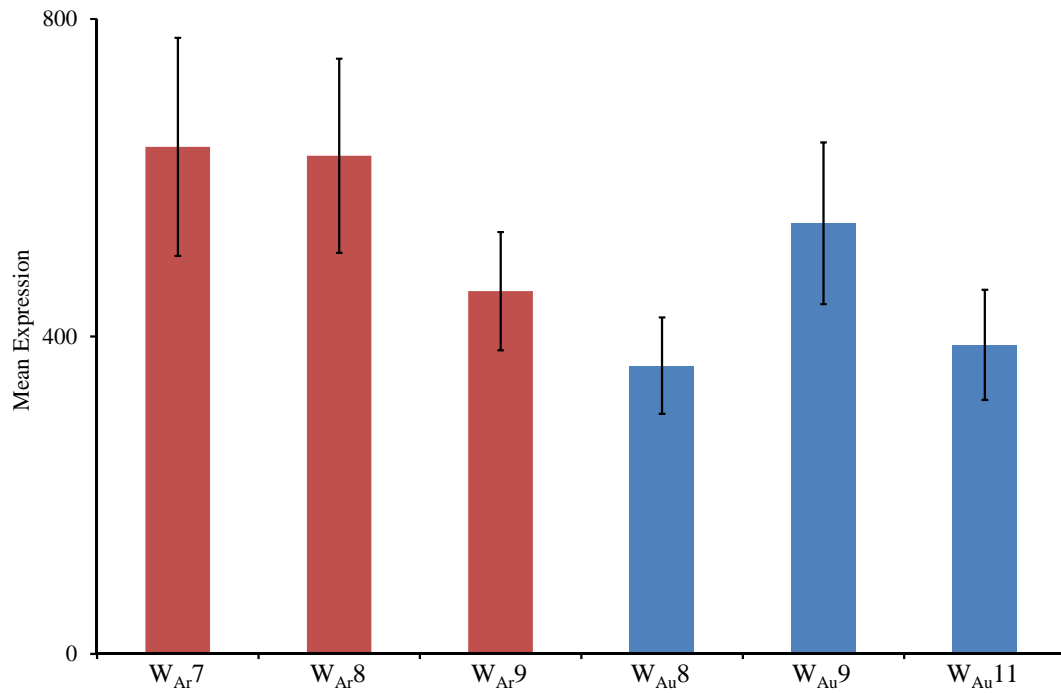

Figure 4: Mean expression level of honey bee reproductive genes identified in the study by Cardoen *et al.* (2011) in bumble workers of the present study. N = 299; error bars are standard error of the mean; W = worker; <sub>A</sub> = adult; <sub>r</sub> = reproductive; <sub>u</sub> = undetermined reproductive status; numbers = colony.

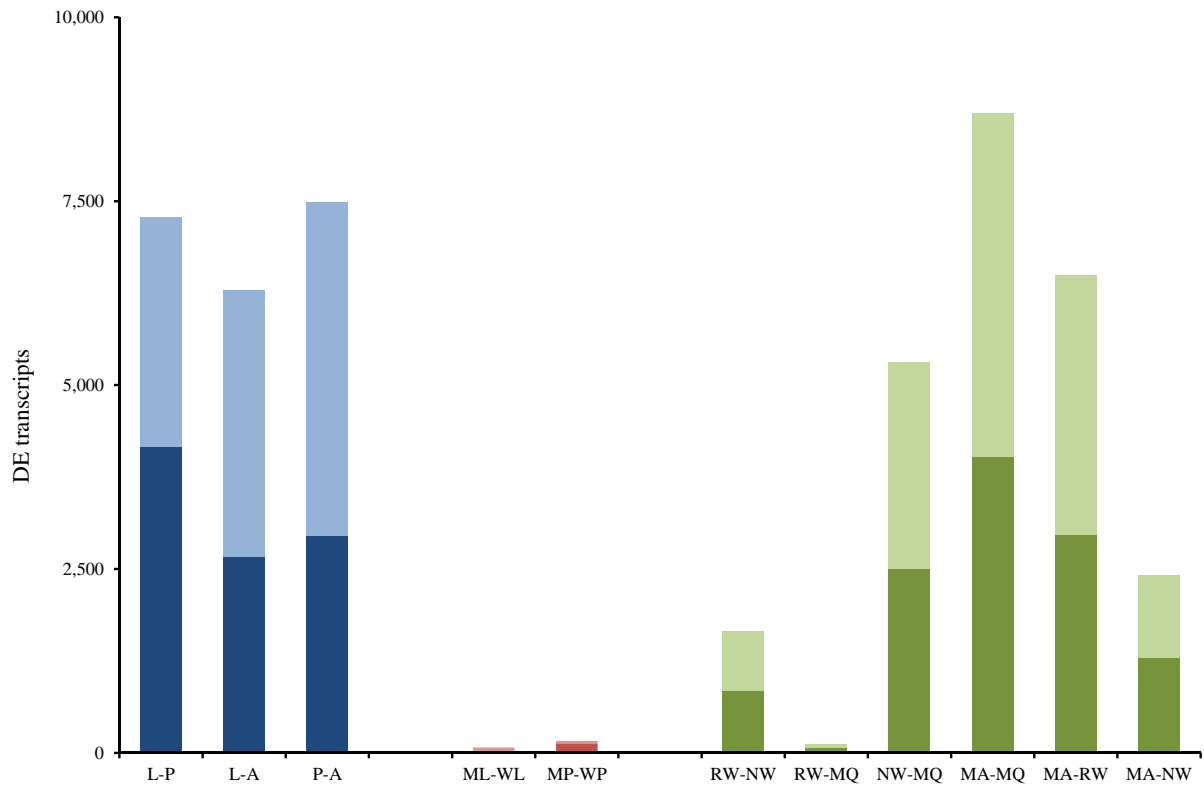

Figure 5: Differentially expressed transcripts within and between developmental stages. Darker colours: up-represented in first named caste; lighter colours: up-regulated in second named caste. M = male; W = worker; MQ = mother queen; L = larva; P = pupa; A = adult; R/N = reproductive/non-reproductive.

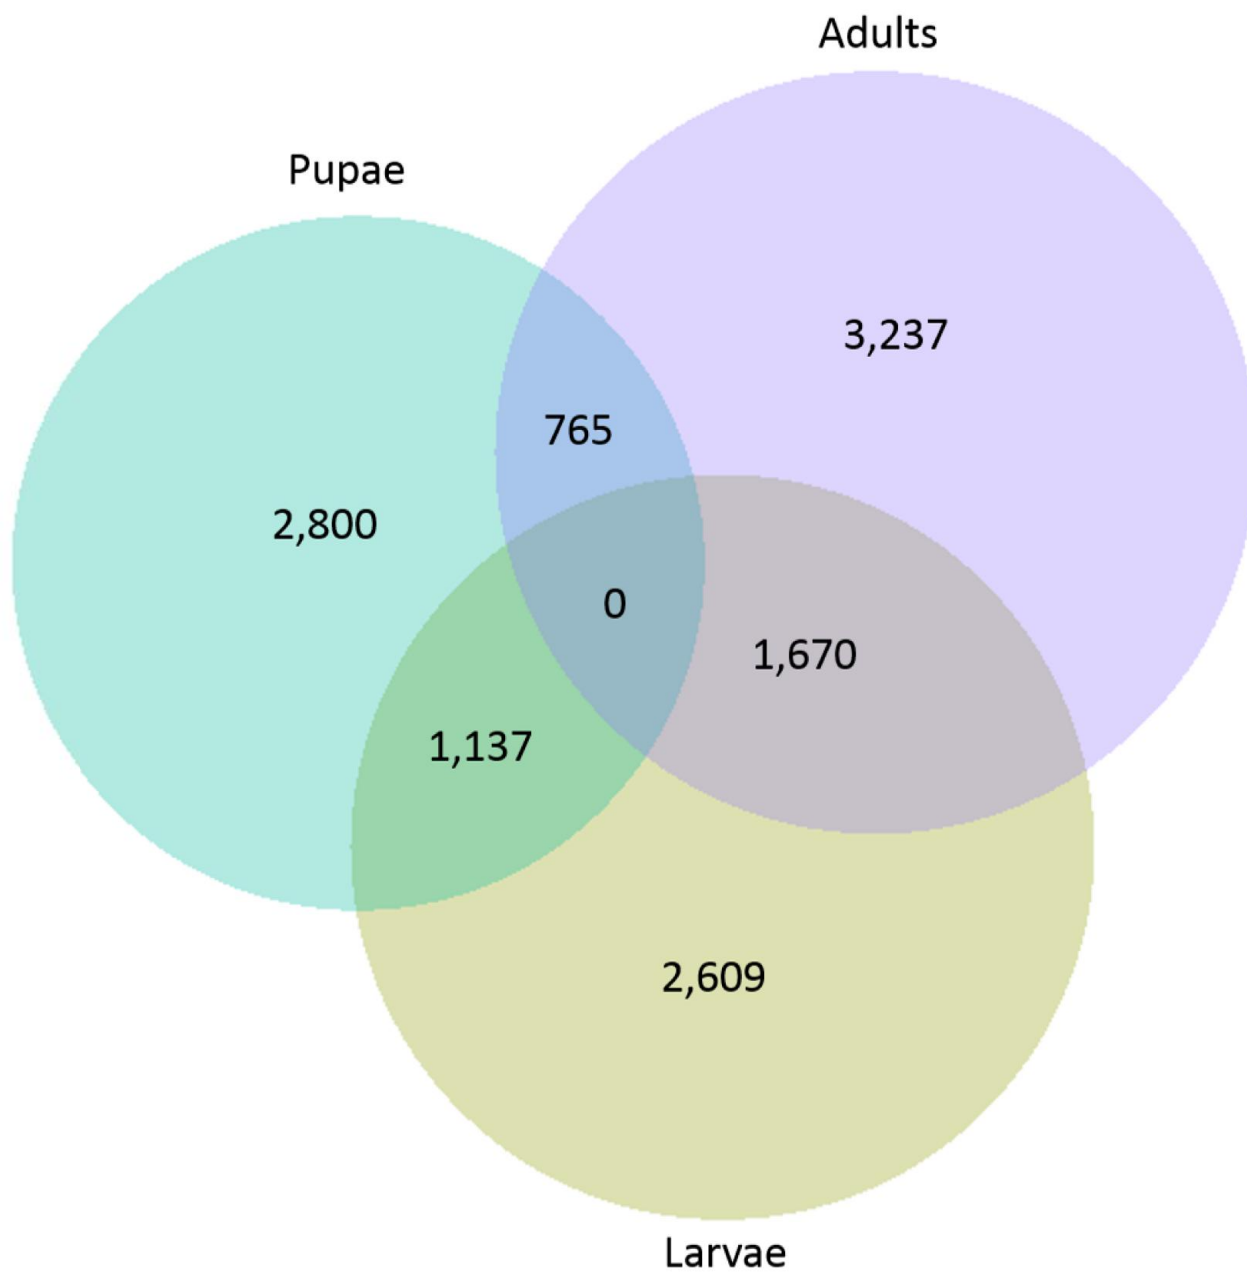

Figure 6: Number of transcripts which were differentially expressed between developmental stages.

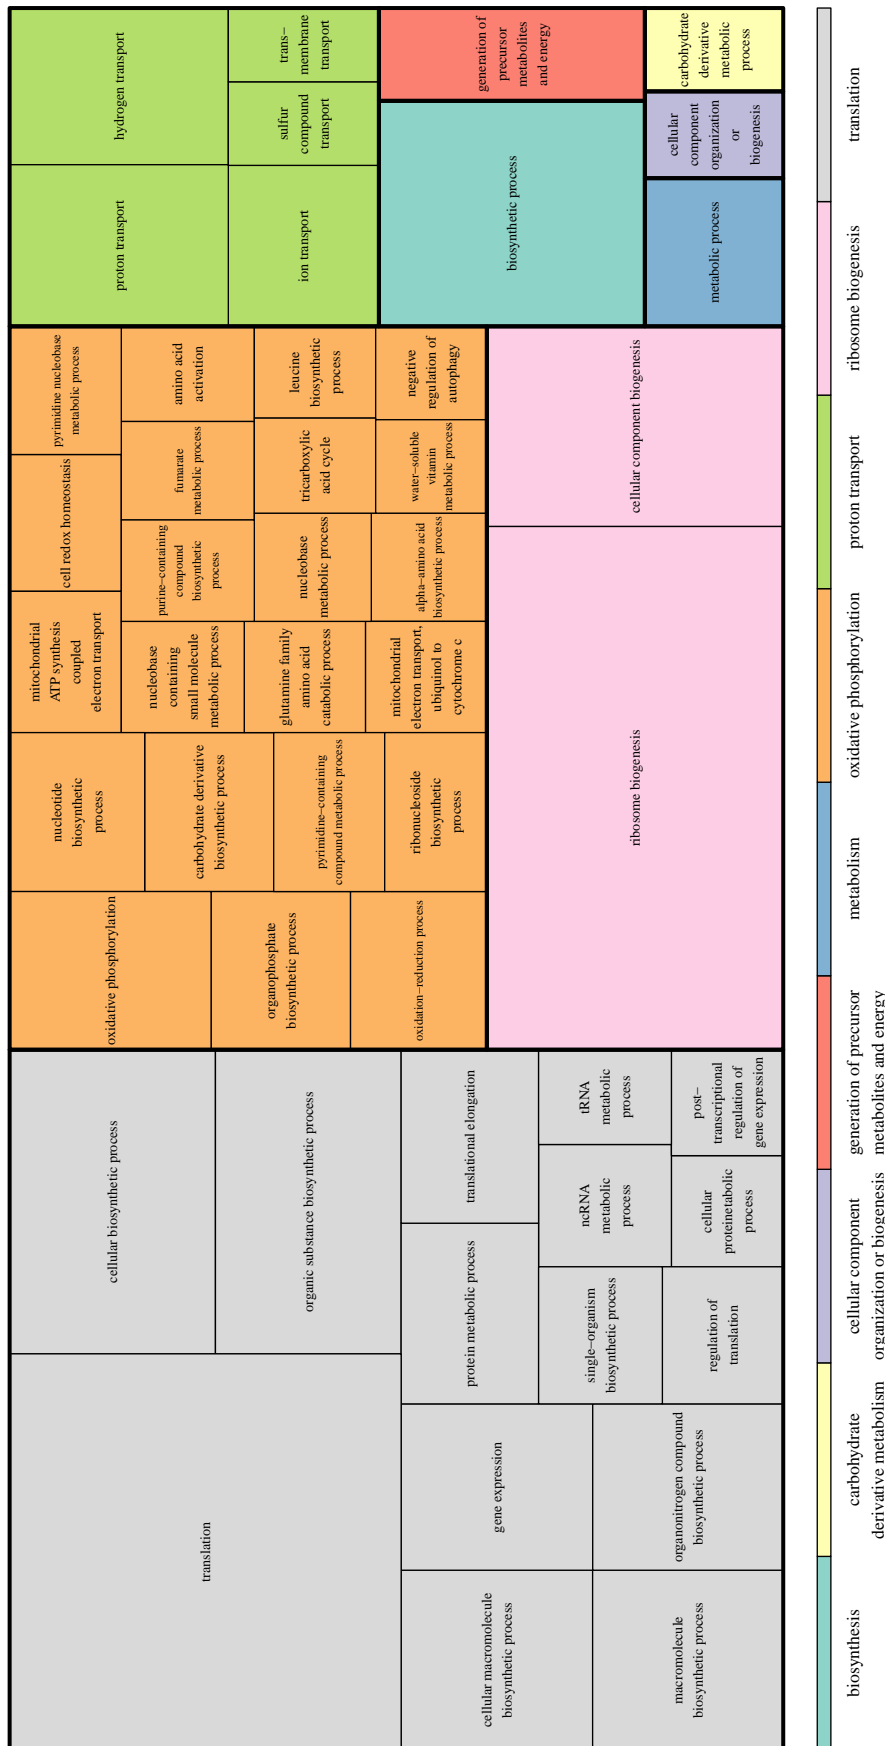

Figure 7: Most highly represented GO terms within larval DE genes (compared to pupae and adults).





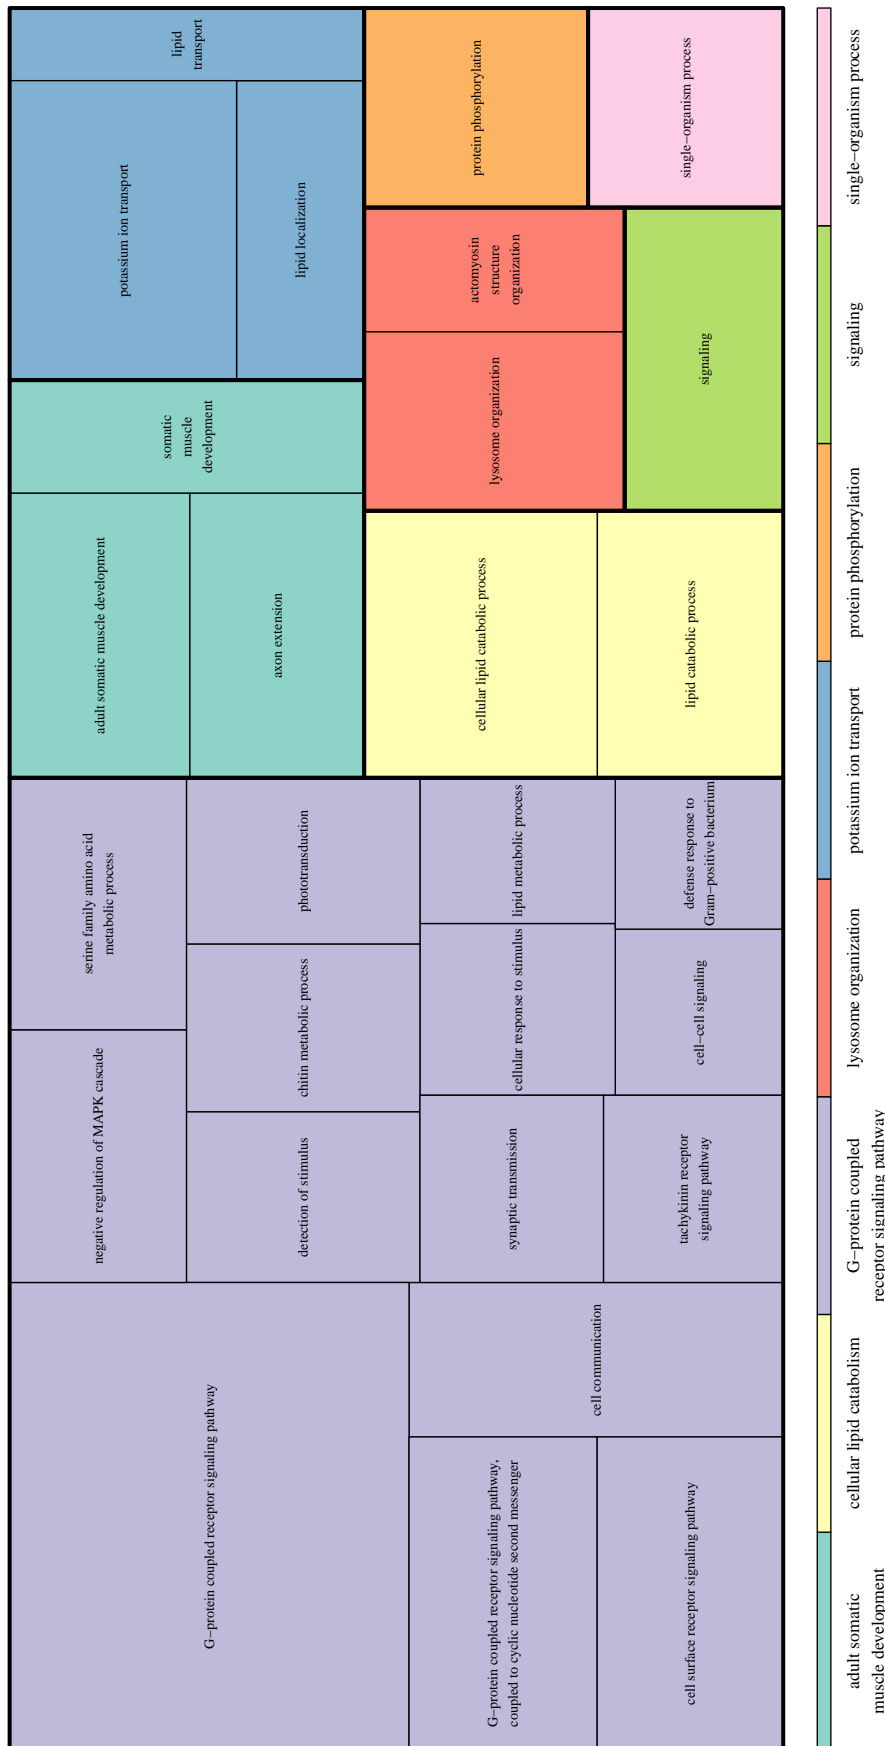

Figure 9: Most highly represented GO terms within adult DE genes (compared to larvae and pupae).

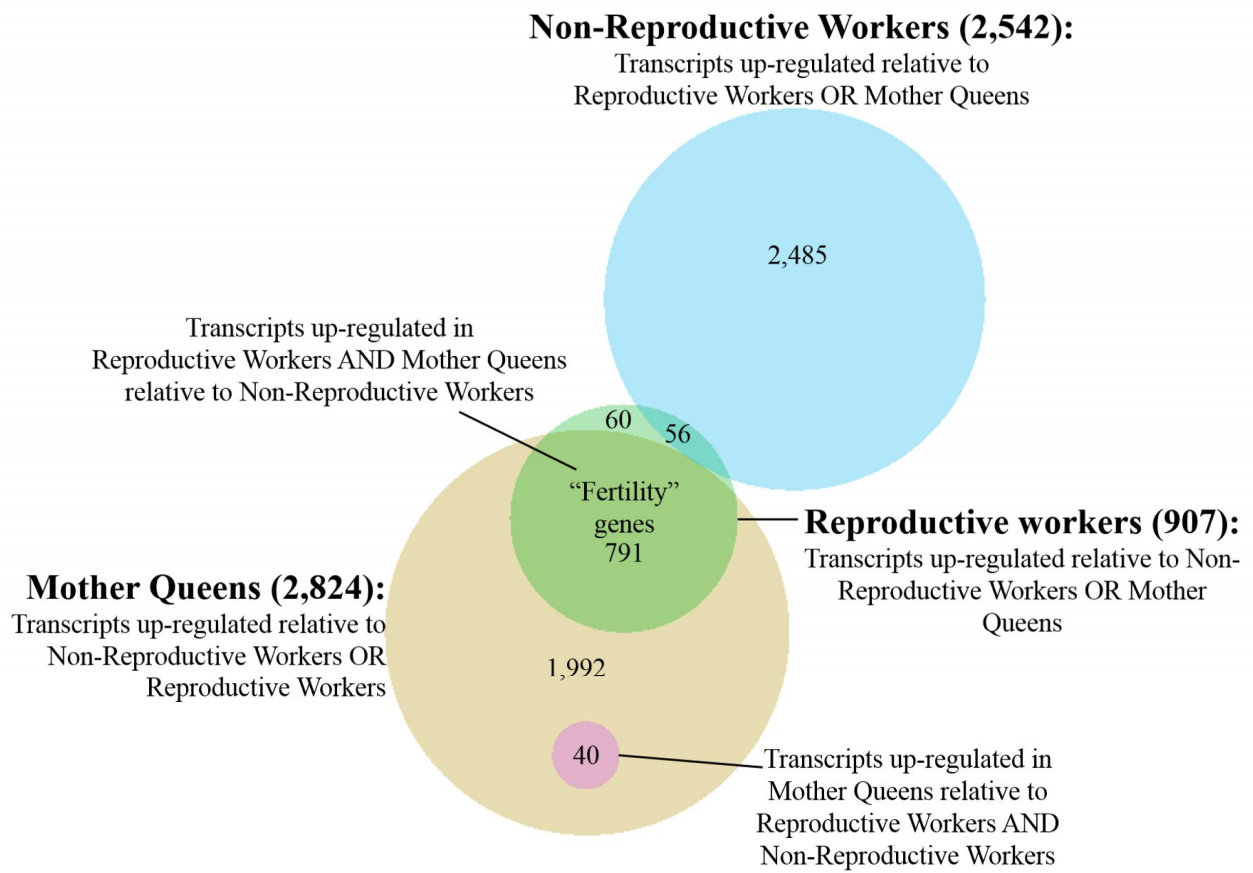

Figure 10: The number of transcripts which are differentially expressed between female adult castes. Overlapping areas indicate shared transcripts.

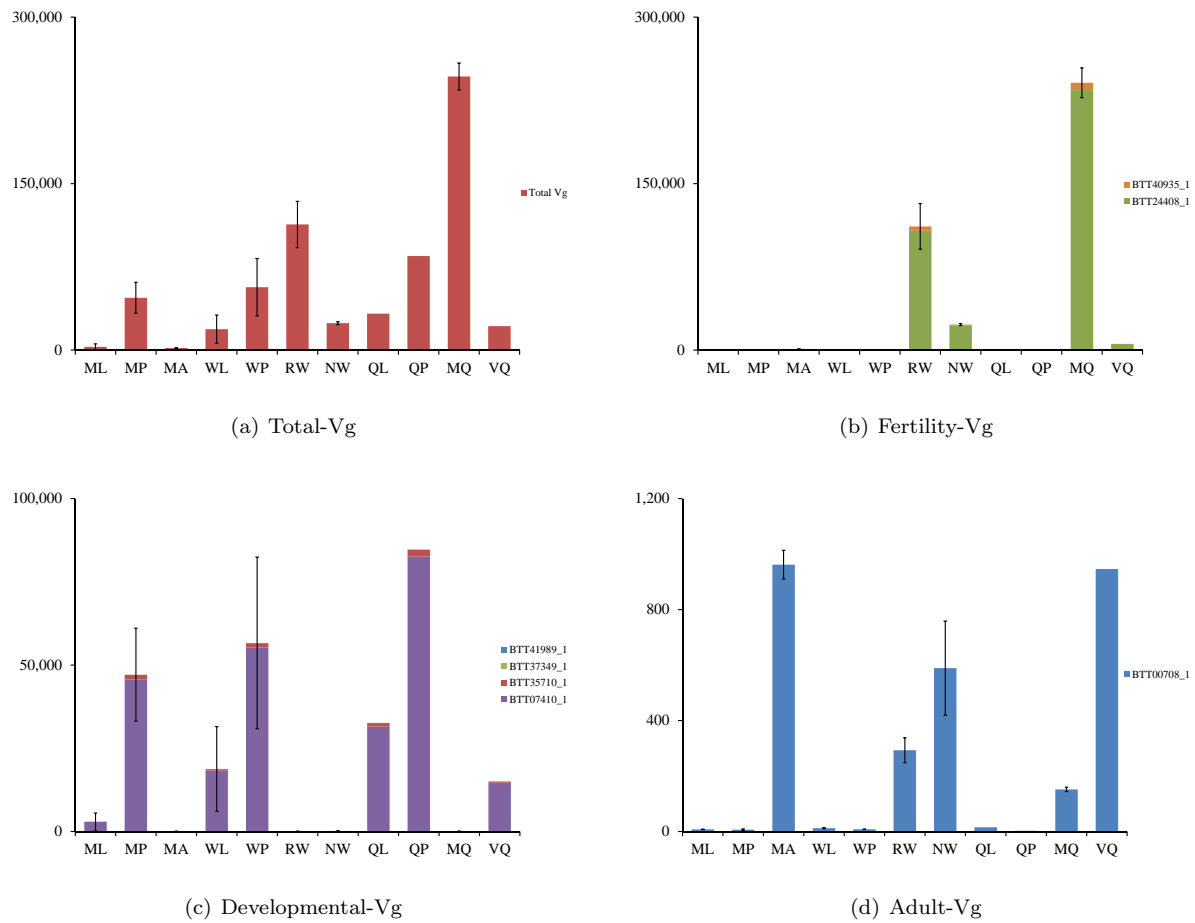

Figure 11: Vitellogenin expression levels within different castes and developmental stages. Expression is mean of normalized counts across replicates; error bars are standard error of the mean. (a) the summed expression level of 18 vitellogenin transcripts; (b) 2 vitellogenin transcripts up-regulated in reproductive workers and mother queens versus non-reproductive workers; (c) 4 vitellogenin transcripts up-regulated in larvae and pupae versus adults; (c) 1 transcript up-regulated in all adults compared to larvae and pupae but down-regulated in reproductive adults. M=male, W=worker, Q=queen, L=larvae, P=pupae, A=adult, NR/R=non-/reproductive, M=mother, V=virgin; All castes include samples from 3 colonies, except RW: 4; NRW: 2; QL, QP & VQ: 1.

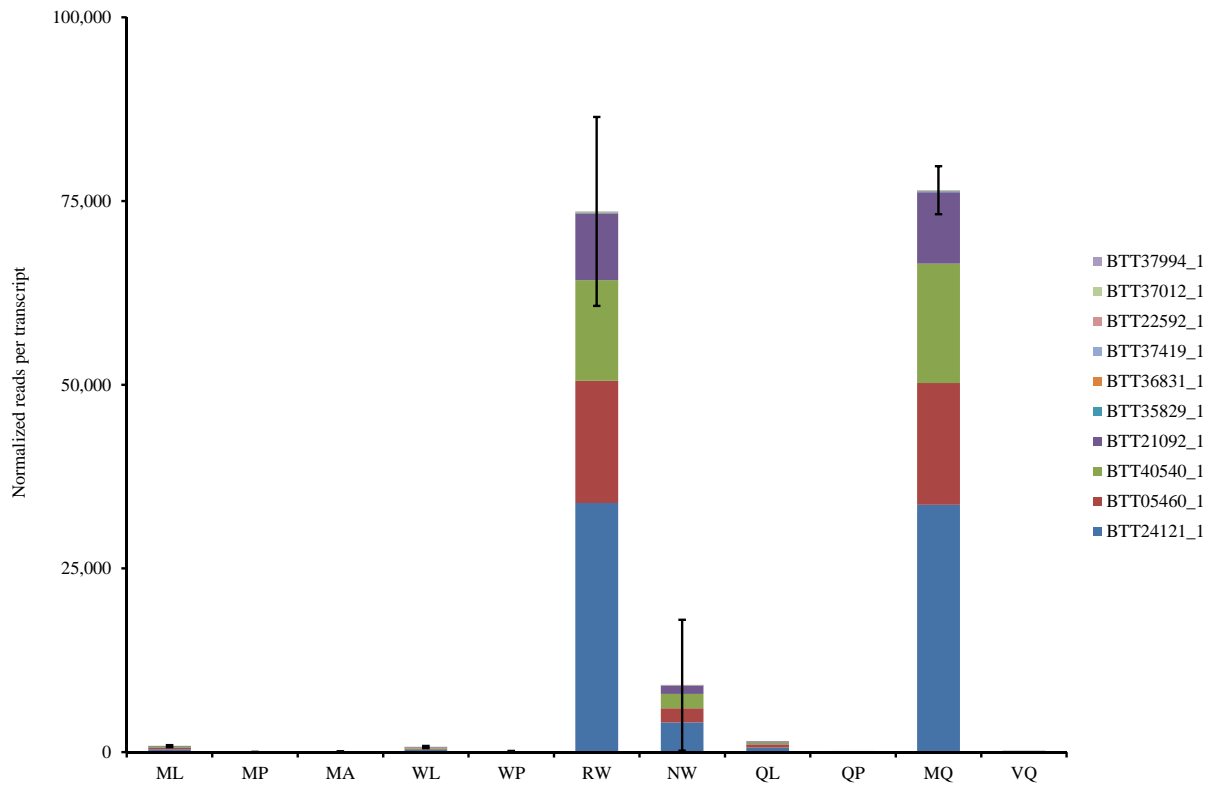

Figure 12: Expression levels of 10  $\alpha$ -glucosidase transcripts within 11 different castes or developmental stages. Expression is mean of normalized counts across replicates; error bars are standard error of the mean. M=male, W=worker, Q=queen, L=larvae, P=pupae, A=adult, NR/R=non-/reproductive, M=mother, V=virgin; All castes include samples from 3 colonies, except RW: 4; NRW: 2; QL, QP & VQ: 1.

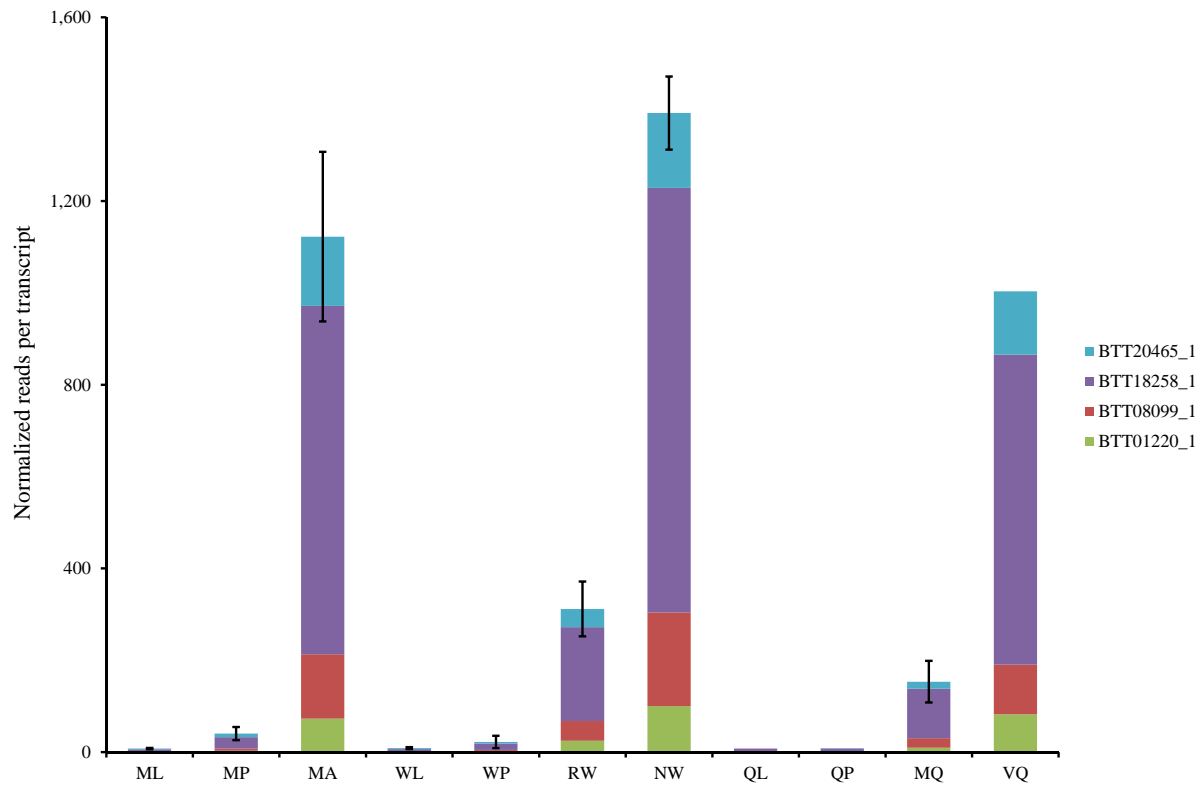

Figure 13: Expression levels of 4 glucose dehydrogenase transcripts within 11 different castes or developmental stages. Expression is mean of normalized counts across replicates; error bars are standard error of the mean. M=male, W=worker, Q=queen, L=larvae, P=pupae, A=adult, NR/R=non-/reproductive, M=mother, V=virgin; All castes include samples from 3 colonies, except RW: 4; NRW: 2; QL, QP & VQ: 1.

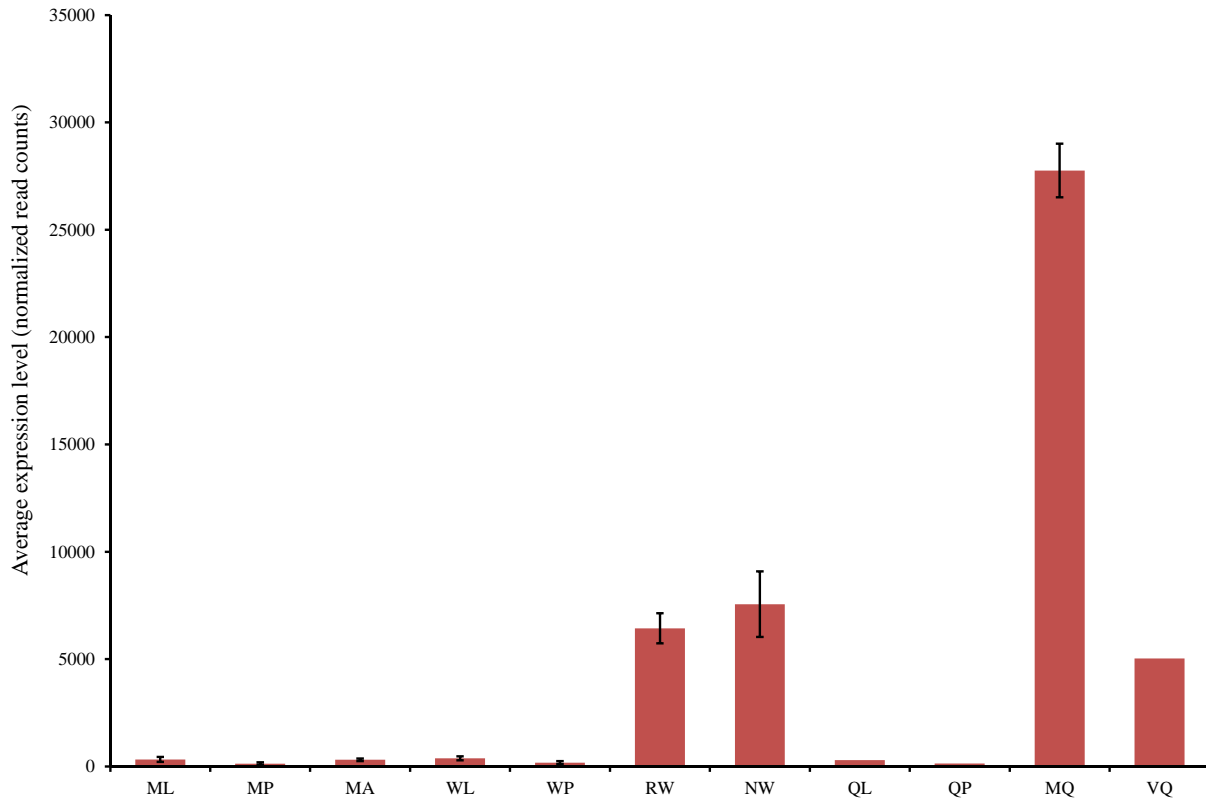

Figure 14: Expression levels of 6 serine protease inhibitors. Expression is mean of normalized counts across replicates; error bars are standard error of the mean. M=male, W=worker, Q=queen, L=larvae, P=pupae, A=adult, NR/R=non-/reproductive, M=mother, V=virgin; All castes include samples from 3 colonies, except RW: 4; NRW: 2; QL, QP & VQ: 1.

720 *Tables*

Table 1: The 27 RNA libraries and the number of pooled individuals contained in each.

| Caste  | Developmental stage             | Colonies |    |    |    |
|--------|---------------------------------|----------|----|----|----|
|        |                                 | 7        | 8  | 9  | 11 |
| Worker | Larva (L2-L4)                   | 18       | 13 | 18 |    |
|        | Pupa                            | 6        | 4  | 5  |    |
|        | Reproductive adult              | 1        | 1  | 1  |    |
|        | Undetermined reproductive adult |          | 1  | 1  | 1  |
| Queen  | Larva (L4)                      | 1        |    |    |    |
|        | Pupa                            | 3        |    |    |    |
|        | Mother queen                    | 1        | 1  | 1  |    |
|        | Virgin queen                    | 1        |    |    |    |
| Male   | Larva (L2-L4)                   | 16       |    | 9  | 7  |
|        | Pupa                            | 4        |    | 9  | 3  |
|        | Adult                           | 1        |    | 1  | 1  |



Table 2: 7 vitellogenin transcripts and the castes in which they are up-regulated.

| Transcript | Caste specificity                              | Top blastx hit                                            | e value            | Protein length | Morandin <i>et al.</i> 2014 | Mean expression across 27 libraries |
|------------|------------------------------------------------|-----------------------------------------------------------|--------------------|----------------|-----------------------------|-------------------------------------|
| BTT24408_1 | Reproductive female adults                     | ACQ91623 ( <i>B. ignitus</i> ) - vitellogenin             | 0.0                | 1,772          | <i>Vg1</i>                  | 43,917                              |
| BTT40935_1 |                                                | ACU00433 ( <i>B. hypocrita</i> ) - vitellogenin           | 5e <sup>-62</sup>  |                |                             | 1,377                               |
| BTT07410_1 | Larvae and pupae                               | XP_003400264 ( <i>B. terrestris</i> ) vitellogenin-6-like | 0.0                | 1,514          | <i>Vg-like-A</i>            | 18,374                              |
| BTT35710_1 |                                                |                                                           | 1e <sup>-164</sup> |                |                             | 477                                 |
| BTT37349_1 |                                                |                                                           | 0.0                |                |                             | 9                                   |
| BTT41989_1 |                                                |                                                           | 3e <sup>-29</sup>  |                |                             | 10                                  |
| BTT00708_1 | Adult males and non-reproductive adult females | XP_003393940 ( <i>B. terrestris</i> ) vitellogenin-like   | 0.0                | 319            | <i>Vg-like-C</i>            | 250                                 |
